1 **Cell-nonautonomously tunable actomyosin flows**

2 **orient distinct cell division axes**

3 Kenji Sugioka<sup>1\*</sup> and Bruce Bowerman<sup>1</sup>

4 <sup>1</sup>Institute of Molecular Biology, 1229 University of Oregon, Eugene, Oregon 97403, USA.

5 \*Corresponding author: Kenji Sugioka. Institute of Molecular Biology, University of Oregon,

6 Eugene, OR 97403 USA. Phone : +1-541-346-0853; fax : +1-541-346-5891; email:

7 sugioka@uoregon.edu

8 **Lead contact:** Kenji Sugioka

9

10

11

12

13

14

15

16

## 17 **Summary**

18 Cell division axes during animal development are arranged in diverse orientations, but the  
19 molecular mechanisms underlying this diversity remain unclear. By focusing on oriented  
20 divisions that are independent of known microtubule/dynein pathways, we show here that the  
21 non-muscle myosin II motor is an extrinsically tunable force generator that orients cell division  
22 axes through cortical actomyosin flows. We identified three extracellular cues that generate  
23 different actomyosin flows. A single contact site locally inhibited myosin activity in a  
24 mechanosensitive manner to generate local flow asymmetry, while size asymmetry of two  
25 contact sites and Wnt signaling both polarized myosin activity and actomyosin flow, with the  
26 latter overriding mechanosensitive effects. These intracellular actomyosin flow anisotropies  
27 specify distinct division axes to establish the geometries of not only *Caenorhabditis elegans* 4-,  
28 6-, and 7-cell stage but also mouse 4-cell stage embryos. Tunable actomyosin flows together  
29 with microtubule/dynein pathways may specify diverse division axes across species.

30 **Keywords:** Mechanosensitivity, Embryogenesis, Dorsal-ventral axis, Cell division, Myosin, Cell  
31 polarity, *Caenorhabditis elegans*, *Mouse*

## 32 **Highlights**

33 Mechanosensitive actomyosin flow orients cell division independent of microtubules.

34 Extrinsic Wnt signal abrogates mechanosensitive effects on cortical flow.

35 Patterns of cell contact establish mouse and *C. elegans* embryonic geometries.

36

37

38

39

## 40 **Introduction**

41           In animal development, cell division axes are arranged in diverse orientations relative to  
42 the niche or body axes during embryogenesis and stem cell division (Knoblich, 2010), and  
43 during brain (Egger et al., 2007), skin (Williams et al., 2014), kidney (Hao et al., 2010), and  
44 heart (Wu et al., 2010) organogenesis. Extrinsic controls of cell division orientation—whereby  
45 one cell instructs another to divide in a spatially organized manner—is a key mechanism of  
46 multicellular assembly (Siller and Doe, 2009; Knoblich, 2010; Williams and Fuchs, 2013; Rose  
47 and Gönczy, 2014). Consistent with this developmental significance, mutations in the genes  
48 required for oriented cell division are associated with various human diseases such as  
49 lissencephaly, microcephaly, leukemia, deafness, Huntington’s disease, and multiple cancers  
50 (Noatynska et al, 2012; Pease and Tirnauer, 2011). Although the molecular and physical  
51 mechanisms underlying oriented cell division have been studied extensively, these investigations  
52 have focused on a limited number of cell types. Extending such analyses to unexplored cells  
53 should expand our overall understanding of the molecular systems required to achieve division  
54 axis diversity *in vivo* and lead to the identification of cell division regulators that can be potential  
55 therapeutic targets.

56           In principle, upstream physical or chemical cues direct downstream force-generation  
57 machinery to orient the cell division axes. Thus far, the microtubule motor protein dynein is the  
58 only known force generator. Dynein works at two different cellular locations: the cell cortex and  
59 the cytoplasm. At the cell cortex, various cues—including cell polarity (Rose and Gönczy, 2014;  
60 di Pietro et al., 2016), tricellular junctions (Bosveld et al., 2016), or mechanical forces (Fink et  
61 al., 2011; Nestor-Bergmann et al., 2014)—localize an evolutionarily conserved protein complex

62 composed of G $\alpha$ , LGN, and NuMA. LGN/G $\alpha$ /NuMA complex binds to dynein and generates  
63 microtubule pulling forces toward cell cortex via minus end-directed dynein movements, thereby  
64 orienting cell division axes to be perpendicular to the cortical site. In the cytoplasm, cell shape  
65 distortion acts as a cue that generates differences in astral microtubule length confined by the cell  
66 cortex. Longer astral microtubules then bind more cytoplasmic dynein to generate greater pulling  
67 force and hence orient division along the cell's long axis (Minc et al., 2011), a mechanism also  
68 known as Hertwig's rule (Wilson, 1925). Although recent reports suggest that F-actin and  
69 myosin motors also participate in cell division orientation, they modulate known pathways by  
70 controlling cell shape (Campinho et al., 2013) and NuMA localization (Seldin et al., 2013) or  
71 downstream microtubule pulling forces (Kwon et al., 2015). One study in *Caenorhabditis*  
72 *elegans* suggested that cell autonomous myosin motions tilt the division plane by approximately  
73 20° in the clock-wise direction during establishment of the left-right body axis, but this model  
74 did not address the possible effects of cell shape or dynein pulling forces on spindle  
75 microtubules, or the upstream cues that influence myosin dynamics (Naganathan et al., 2014).  
76 Thus, microtubule motor dynein-dependent force generation machineries are the only known  
77 tunable mechanism of cell division orientation controlled by extracellular signals. However, fly  
78 and mouse without centrosome and astral microtubules still form a relatively normal body plan  
79 (Basto et al., 2006; Bazzi and Anderson, 2014), suggesting that pulling forces acting on astral  
80 microtubules may not be the sole tunable forces that drive oriented cell division.

81 Non-muscle myosin II is an actin-dependent motor protein that regulates cellular  
82 contractility and cortical flow—the concerted movement of a viscoelastic cell surface layer  
83 comprising F-actin, myosin, and cross-linking factors (Bray and White, 1988; Levayer and  
84 Lecuit, 2012). Cortical flow plays vital roles during development such as cell locomotion,

85 growth cone migration, cell polarization, and cytokinesis (Bray and White, 1988). When a  
86 molecular clutch physically connects cortical actomyosin to the plasma membrane, cortical flow  
87 generates forces that drive cell migration or morphogenesis (Case and Waterman, 2015; Roh-  
88 Johnson et al., 2012). The mechanistic basis for cortical flow orientation is the anisotropy of  
89 cellular contractility, which generates flow from regions of low to high contractility within the  
90 cell (Mayer et al., 2010). The velocity of cortical flow is further regulated by actin dynamics and  
91 non-muscle myosin II motor activity (Mayer et al., 2010). In the case of cytokinesis, cortical  
92 flow is oriented toward the equatorial region of the cell and contributes to contractile ring  
93 assembly (Uehara et al., 2010; Yumura et al., 2008; Zhou and Wang, 2008; Reymann et al.,  
94 2016). Inhibiting myosin activity or actin dynamics limits flow velocity, resulting in cytokinesis  
95 failure (Murthy and Wadsworth, 2005). Most studies to date have focused on single cells, while  
96 the regulation of cortical flow in multicellular system and its role during cell division remain  
97 poorly understood.

98         In the present study, we identified an extrinsically tunable myosin-dependent force  
99 generation mechanism that controls cell division orientation in both *C. elegans* and mouse  
100 embryos. In multicellular contexts, a single cell may receive multiple physical and chemical cues  
101 from different neighboring cells, complicating the identification of critical cues. To overcome  
102 this predicament, we used isolated blastomeres and adhesive polystyrene beads to reconstitute  
103 multicellular environments. We identified three extracellular cues that control cortical  
104 actomyosin flow during oriented cell divisions: physical contact, asymmetrical contact size, and  
105 Wnt signaling. Each of these cues modified myosin activity to generate distinct cortical flows  
106 that differently oriented cell divisions to establish multicellular architecture in *C. elegans* 4, 6,  
107 and 7-cell stage embryos. Moreover, we show that a similar mechanosensitive mechanism

108 oriented cell division in mouse embryos, and document a conserved physical basis underlying  
109 the establishment of 4-cell stage architectures in both nematodes and mice, and likely also in  
110 humans. Our discovery of a novel molecular mechanism that regulates the orientation of cell  
111 division axes significantly advances our understanding of division axis diversity and the  
112 assembly of multicellular architectures during animal development.

113

## 114 **Results**

115 *Oriented AB cell division during C. elegans dorsal-ventral (D-V) axis establishment is a*  
116 *microtubule-independent process*

117 To identify oriented cell division mechanisms that are independent of known microtubule/dynein  
118 pathways, we focused on AB cell division in 2-cell stage *C. elegans* embryos. The anterior AB  
119 cell divides before the posterior P<sub>1</sub> cell, and their daughters always adopt a diamond shape at the  
120 4-cell stage, with the posterior daughter of AB (ABp) and anterior daughter of P<sub>1</sub> (EMS) aligned  
121 perpendicularly to the anterior-posterior (A-P) axis to define the D-V body axis (Fig. 1A) (Priess  
122 and Thomson, 1987; Sulston and Horvitz, 1977). This diamond shape is critical for later  
123 development, as signals from P<sub>2</sub> activate Notch signaling in ABp and Wnt signaling in EMS to  
124 specify different cell fates (Fig. 1A) (Priess, 2005; Sawa and Korswagen, 2013). During cell  
125 division, the AB and P<sub>1</sub> mitotic spindles are oriented parallel and perpendicular to the plane of  
126 AB-P<sub>1</sub> cell contact, respectively (Fig. 1B). P<sub>1</sub> spindle orientation is regulated by an upstream cue  
127 from the midbody remnant of zygotic division and a downstream LGN/dynein-dependent force  
128 generation mechanism (Singh and Pohl, 2014; Srinivasan et al., 2003). However, the AB division  
129 axis oriented normally after LGN knock-down, suggesting that oriented AB division is  
130 independent of cortical dynein-dependent microtubule pulling forces (Fig. 1B). Furthermore, the

131 long axis of the AB cell before cell division did not correlate with its division axis, indicating  
132 that the oriented AB division is regulated independently of Hertwig's rule (Fig. S1A-B). To  
133 assess the potential roles of other microtubule-dependent mechanisms in AB cell division  
134 orientation, we treated embryos with the microtubule-depolymerizing drug nocodazole (12.5  
135 ng/ml) and found that the division axes of AB were unaffected while those of P<sub>1</sub> were  
136 randomized (Fig. S1C). Furthermore, even when spindle formation was abolished by treatment  
137 with 20 µg/ml nocodazole, non-muscle myosin II still formed a cleavage furrow in AB that was  
138 oriented perpendicularly to the plane of cell contact (Fig. 1C). These results indicate that a  
139 previously unknown microtubule-independent mechanism establishes the AB division axis.

140

#### 141 *Myosin activity regulates AB cell division orientation*

142 We investigated the mechanisms underlying oriented AB cell division. We found that  
143 knockdown of the Cullin E3 ubiquitin ligase component CUL-3 resulted in a randomization of  
144 the AB division axis, with 27% of the 4-cell stage embryos showing a linear cell arrangement  
145 and thus a severely disrupted D-V axis (Fig. 2A). During cell division in *cul-3(RNAi)* embryos,  
146 non-muscle myosin II foci were abnormally distributed throughout the cell cortex, although a  
147 functional contractile ring was subsequently formed (Fig. 2B, D), suggesting that CUL-3 acts via  
148 an actomyosin-dependent pathway to orient AB cell division. To evaluate this possibility, we  
149 manipulated non-muscle myosin II activity by pharmacological treatment or RNAi. The Rho  
150 GTPase-activating protein RGA-3 targets RhoA and its knock-down activates myosin II (Fig.  
151 2C) (Schonegg et al., 2007). We found that *rga-3(RNAi)* resulted in broader distribution of  
152 myosin II foci and abnormal orientation of AB division axes, similar to what we observed after  
153 *cul-3(RNAi)* (Fig. 2B). ML-7 is a myosin light chain kinase inhibitor that inactivates myosin II

154 (Fig. 2C) (Saitoh et al., 1987); ML-7 treatment inhibited cell contraction and randomized the  
155 orientation of AB division axes (Fig. 2F). Taken together, these results indicate that myosin II  
156 activity regulates orientation of the AB division axis.

157

### 158 *Physical contact is an upstream cue for AB cell division orientation*

159 We next explored the origin of upstream cues that orient AB cell division. To test whether cell  
160 contact serves as a cue, we isolated early 2-cell stage AB and P<sub>1</sub> cells and recombined them in  
161 culture medium to create contact sites at random locations (Fig. 1D). The AB division axis was  
162 initially randomly oriented, but then rotated to become aligned with the AB-P<sub>1</sub> boundary by the  
163 end of telophase (hereafter referred to as parallel division) (Fig. 1D and Movie S1), suggesting  
164 that cell contact is an upstream cue that orients AB cell division. Extrinsic cues transmitted  
165 through cell contact can be either mechanical or chemical in nature. To evaluate the former  
166 possibility, we used carboxylate-modified polystyrene beads that nonspecifically bind to the  
167 amine groups of extracellular proteins. Attachment of a bead to isolated AB cells resulted in  
168 parallel division (Fig. 1D and Movie S1), demonstrating that physical contact is sufficient to  
169 orient AB cell division. To examine whether physical contact distorts cell shape, we measured  
170 the perpendicular and parallel cell diameters relative to the beads and found that their ratio was  
171 approximately 1.0 (mean  $\pm$  SD:  $0.991 \pm 0.021$ ,  $n = 20$ ), indicating that cell-bead contact did not  
172 cause changes in cell shape and that bead-induced oriented AB division was independent of  
173 Hertwig's rule. Thus, mechanical signals from cell contact are an upstream cue that directly  
174 orients AB cell division.

175 We also investigated the requirement for myosin activity in the mechanosensitive  
176 regulation of division axis orientation. ML-7 treatment in the cell-bead experiment caused



177 randomization of the AB division axes relative to the beads (Fig. 2G, upper panel). In contrast,  
178 neither nocodazole treatment nor LGN knockdown affected cleavage furrow orientation (Fig.  
179 2G, bottom panel and Fig. S2B). Although cytokinesis was defective following ML-7 treatment,  
180 this was not the direct cause of abnormal division axis orientation, as cytokinesis-defective cells  
181 from ZEN-4/MKLP-1 mutants oriented normally in parallel to the bead (Fig. S2B). Taken  
182 together, these data indicate that physical contact orients AB cell division through an  
183 actomyosin-dependent mechanosensitive process.

184

### 185 *Physical contact induces intracellular myosin flow anisotropy*

186 To understand how physical contact controls actomyosin activity, we analyzed the dynamics of  
187 cortical myosin II foci. We defined the x axis as passing through the spindle poles and the y axis  
188 as perpendicular to the x axis and within the plane of the cell and bead centers (Fig. 3A). We also  
189 divided the AB cell surface into four quadrants— U1, U2, B1, and B2—with B2 attached to the  
190 bead (Fig. 3A). Cell movements were computationally removed to precisely analyze cortical  
191 myosin II dynamics. In the absence of a bead, myosin foci flowed toward the cell equator along  
192 the x axis and exhibited no directional y-axis movements (Figs. 3A, B and S4 and Movie S2).  
193 However, upon bead attachment, x-axis myosin movements were significantly reduced in B2  
194 (Figs. 3A, B and 4A and Movie S2, S3), and y-axis movements were observed that were always  
195 in the counter-clockwise direction around the division axis when viewed from the nearest pole,  
196 with U1 and B1 moving in the direction opposite to U2 and B2 (Figs. 3A and S4 and Movie S2).  
197 Intact embryos exhibited similar myosin movements (Fig. 3A–C), suggesting that contact with  
198 either beads or cells induces anisotropic myosin II flow. In *cul-3(RNAi)* embryos, where division  
199 axes became abnormal, x-axis myosin flow asymmetry was lost, whereas y-axis movements

200 were similar to the control (Fig. 3A-C), suggesting that the localized x-axis myosin flow  
201 asymmetry is important for oriented cell division. Moreover, although y-axis myosin movements  
202 were always counter-clockwise regardless of bead position, the x-axis myosin movements were  
203 specifically reduced at the contact site. Due to this spatial response, the equatorial myosin flows  
204 distal and proximal to the contact site were symmetric and asymmetric, respectively, creating a  
205 local myosin flow asymmetry within the cell (Fig. 7G, black arrows in the left panel and Movie  
206 S3).

207

### 208 *Physical contact limits RLC phosphorylation to generate anisotropic actomyosin flow*

209 We next investigated how bead attachment or cell contact limits equatorial (x-axis) myosin flow.  
210 First, the velocity of equatorial myosin flow in B2 was inversely proportional to bead diameter  
211 (Fig. 4A, B). In addition, the duration of myosin foci on the cell cortex (i.e., foci lifetime) was  
212 reduced at the contact site (Fig. 4D), implying that physical contact controls myosin II activity.

213 We thus sought to position the role of physical contact within the cascade of  
214 biochemically characterized myosin regulatory pathways (Fig. 4H). For non-muscle myosin,  
215 each myosin II heavy chain dimer binds two essential light chains and two regulatory light  
216 chains (RLC) to form a hexamer. RLC phosphorylation at the evolutionarily conserved Thr 18  
217 and Ser 19 residues controls myosin activity: the ATPase activity of myosin is increased by the  
218 RLC phosphorylation (Adelstein and Conti, 1975) and RLC phosphorylation triggers a  
219 conformational change from a closed to an open form that allows minifilament assembly and  
220 promotes downstream contraction (Fig. 4H) (Craig et al., 1983; Scholey et al., 1980; Vicente-  
221 Manzanares et al., 2009). We first assessed whether the myosin foci we observed *in vivo*  
222 represent myosin minifilaments. When we blocked F-actin assembly using the actin-

223 depolymerizing drug latrunculin A (LatA), myosin foci were stabilized with some exhibiting a  
224 filamentous morphology (Fig. 4D, E), suggesting that myosin foci formation does not require F-  
225 actin interaction. On the other hand, inhibition of RLC phosphorylation by ML-7 treatment  
226 resulted in the loss of myosin foci and reduced foci life time (Fig. 4D, E). As ML-7 treatment did  
227 not affect cortical localization of myosin, reduced foci lifetime suggests they disassemble rather  
228 than detach from the cortex (Fig. 4E, F). Furthermore, activation of RLC phosphorylation by  
229 *rga-3(RNAi)* increased foci life time (Fig. 4D). These results suggest that myosin foci are myosin  
230 minifilaments with their life time regulated by RLC phosphorylation. Notably, the level of RLC  
231 phosphorylation correlates with myosin foci velocity (Fig. 4C). Therefore, mechanosensitive  
232 reduction of equatorial myosin flow velocity at the contact site may be caused through the  
233 inhibition of RLC phosphorylation.

234 To determine whether RLC phosphorylation is indeed reduced by cell or bead contact, we  
235 performed immunolabeling using anti p-RLC (Ser19) antibody that recognizes *C. elegans* MLC-  
236 4/RLC (Zonies et al., 2010). In the absence of contact, p-RLC co-localized with myosin II-GFP  
237 (Fig. 4G). On the other hand, after P<sub>1</sub> cell or bead attachment, p-RLC signal intensity at the  
238 contact site was markedly reduced to  $57 \pm 6\%$  of the intensity at the pole region ( $P = 0.0012$ ), in  
239 contrast to myosin-GFP ( $136 \pm 15\%$  intensity relative to the pole region) (Fig. 4G). Thus  
240 physical contact locally inhibits myosin RLC phosphorylation, thereby limiting myosin activity  
241 and flow during the generation of local actomyosin flow asymmetry (Fig. 4H).

242

### 243 *Actomyosin flow generates forces to trigger cell surface movements*

244 For the control of cell division orientation, actomyosin flow needs to generate forces that act on  
245 the cell surface. To determine whether actomyosin flow generates forces that trigger cell surface

246 movement, we coated isolated AB cells attached to a 30  $\mu\text{m}$  bead with carboxylate-modified  
247 particles (0.35  $\mu\text{m}$  in diameter) and found that the surface particles exhibited flows that were  
248 similar to those of myosin II foci and also were limited near the contact site (Fig. 3E and Movie  
249 S4). These results suggest that mechanosensitive actomyosin flow generates forces to move the  
250 cell surface through a molecular clutch that links the actomyosin cortex to the plasma membrane  
251 (Fig. 3D) (Case and Waterman, 2015). Given that equatorial cell surface movement is  
252 asymmetric in B1 and B2 but not in U1 and U2, we propose that cell surface proximal to the  
253 contact site moves toward B2, generating directional torque and orienting the dividing cell in  
254 parallel to the contact site (Fig. 7G, orange arrows in the left panel).

255

256 *Mechanosensitive myosin pathway orients cell division in C. elegans and mouse embryos to*  
257 *establish the 4-cell architecture*

258 We investigated whether the mechanosensitive myosin-dependent mechanism we described also  
259 operates in mammals using mouse embryos. As in *C. elegans*, the 2-cell stage mouse embryo  
260 undergoes asynchronous divisions; the early dividing cell is called AB and the other CD (Kelly  
261 et al., 1978). Both AB and CD cells in intact 4-cell stage embryos underwent division in parallel  
262 to the contact site; 88% of embryos had a tetrahedral shape and 12 % were diamond shaped (Fig.  
263 5A, C and Movie S5). Previous studies have shown that the mitotic spindle was randomly  
264 oriented at metaphase (Louvét-Vallee et al., 2005) and removal of the zona-pellucida—a  
265 glycoprotein layer surrounding cells—resulted in abnormal cell division orientation (Graham and  
266 Deussen, 1978; Suzuki et al., 1995), implying that steric confinement by the zona pellucida,  
267 rather than active force generation, orients these cell divisions. However, we found that in  
268 embryos lacking the zona pellucida (i.e., zona-free embryos), AB division always oriented in

269 parallel to the contact site (Fig. 5A and Movie S5). We therefore assessed whether AB/CD cells  
270 respond to physical contact. When attached to beads, isolated AB or CD blastomeres underwent  
271 parallel division, suggesting that physical contact acts as a cue for oriented division (Fig.5A and  
272 Movie S5). Moreover, ML-7 treatment inhibited parallel division (Fig. 5A) and cell or bead  
273 contact locally reduced p-RLC localization (Fig. 5B and Fig. S5). Thus, as in *C. elegans*, mouse  
274 2-cell stage embryos undergo mechanosensitive myosin-dependent oriented cell division.

275 We next investigated how the mechanosensitive myosin-dependent pathway contributes  
276 to the establishment of *C. elegans* and mouse 4-cell embryo architectures that are critical for later  
277 development. As described above, previous study has indicated that zona-free mouse embryos  
278 exhibit abnormal division axes and 4-cell stage architecture. We confirmed these defects in zona-  
279 free embryos but in a more specific way; 25% of CD divisions were perpendicular to the contact  
280 site, resulting in T-shaped 4-cell embryos (Fig. 5C and Movie S6). These results do not indicate  
281 that CD cells are less capable of parallel division; indeed isolated CD cells always responded to  
282 bead contact with parallel divisions (Fig. 5A). Rather, the difference between the AB and CD  
283 divisions within embryos is their number of contact sites, with AB having one contact with CD  
284 and CD having two contacts, one with each AB daughter.

285 We analyzed the significance of two contacts and extracellular material on cell division  
286 orientation in mouse and *C. elegans*, by using wild-type embryos, embryos without extracellular  
287 materials (eggshell- or zona-free), and isolated *C. elegans* P<sub>1</sub> cells attached to two beads (Fig.  
288 5D). As in the case of CD cells, P<sub>1</sub> cells attached to a single bead always underwent parallel  
289 division (Fig. S1D). However, when CD or P<sub>1</sub> have two contact sites, we found that the angle of  
290 initial cell division (at metaphase in *C. elegans* and at the onset of cell elongation in mouse),  
291 relative to a line passing through the centroids of the two contacting beads or cells (defined as

292  $\alpha$ ), was the major determinant of the division pattern (Fig. 5D). When  $\alpha$  was  $< 60^\circ$ , P<sub>1</sub> and CD  
293 cells rotated toward contact sites to undergo parallel division (Fig. 5D). However, this rotation  
294 did not occur when  $\alpha$  was  $> 60^\circ$ , possibly due to symmetric contacts with the B1 and B2 regions,  
295 and most cells formed T-shaped patterns (Fig. 5D). Additionally,  $\alpha$  was  $< 60^\circ$  in both *C. elegans*  
296 and mouse in the presence of extracellular material, suggesting that steric confinement affects the  
297 initial P<sub>1</sub>/CD division angle (Fig. 5D). Indeed, the eggshell/zona pellucida ensures the rotation of  
298 dividing AB cells in *C. elegans* or CD cells in mouse toward the cell contact (Movie S6). These  
299 results suggest that extracellular material prevents the selection of an alternative division axis  
300 created by the additional cell contact, thereby ensuring parallel P<sub>1</sub>/CD cell division in intact  
301 embryos. Finally, the difference in diamond/tetrahedral shape distribution between *C. elegans*  
302 and mouse 4-cell stage are likely due to the ellipsoidal and spherical extracellular material shapes,  
303 respectively (Yamamoto and Kimura, 2017). Thus, the 4-cell architecture in mouse and *C.*  
304 *elegans* is established via a common sequence of events: physical contact-dependent parallel  
305 division orients AB cell division, and extracellular material-dependent steric hindrance prevents  
306 P<sub>1</sub>/CD cell from having symmetric contacts with AB daughters that would otherwise lead to a T-  
307 shaped architecture (Fig. 6C).

308

309 *Second cue: asymmetric-sized contacts polarize actomyosin flow to orient left-right division axis*

310 We also investigated myosin-dependent division axis control in later-stage *C. elegans* embryos.

311 After formation of the 4-cell stage diamond shape, ABa cells divide along the left-right body axis

312 (Fig. 6A) (Sulston et al., 1983). ML-7 treatment disrupted ABa cell orientation, suggesting that

313 this process requires actomyosin activity (Fig. 6B). Before cell division, ABa is adjacent to

314 larger ABp and smaller EMS cells, creating asymmetric-sized contacts. To recapitulate this

315 situation, isolated ABa cells were attached to asymmetric (30- and 20- $\mu\text{m}$ ) beads. Upon  
316 attachment, 82% of ABa cells underwent a “crossover”-type division analogous to the left-right  
317 oriented division in wild-type embryos (Fig. 6B and Movie S7). In contrast, when ABa cells  
318 were attached to symmetric-sized (two 30- $\mu\text{m}$  or two 20- $\mu\text{m}$ ) beads, the frequency of the  
319 crossover-type division was decreased (Fig. 6B). AB cells—the mother of ABa with larger  
320 size—showed similar behaviors (Fig. 6B). These results suggest that asymmetric cell contacts  
321 serve as a cue that induces crossover-type cell division, which in an intact embryo results in left-  
322 right oriented ABa cell division.

323 Analysis of myosin foci velocities revealed that both *in vivo* or upon attachment of  
324 asymmetric-sized beads, the two halves of the ABa cell showed asymmetric myosin velocities  
325 (Fig. 6C, D and Movie S7). Conversely, attachment to symmetric-sized beads yielded symmetric  
326 velocities (Fig. 6C, D and Movie S7). Asymmetric-sized contacts also induced a polarized  
327 localization of p-RLC, suggesting an asymmetric activation of myosin in these dividing cells  
328 (Fig. 6E, F). These results indicate that asymmetry in cell contact size is a cue that polarizes  
329 myosin activity and flow to specify left-right oriented ABa cell division.

330

331 *Third cue: extrinsic Wnt signal polarizes actomyosin flow to abrogate mechanosensitive effects*

332 Following ABa cell division at the 6-cell stage, the EMS cell receives a Wnt signal from the  
333 posteriorly located P<sub>2</sub> cell and undergoes asymmetric cell division to produce anterior mesoderm  
334 and posterior endoderm precursor cells (Fig. 7A) (Rocheleau et al., 1997; Thorpe et al., 1997).  
335 Despite EMS cell contacts with ABal, ABar, ABpl, ABpr, and P<sub>2</sub> cells, EMS division is oriented  
336 toward P<sub>2</sub> in a Wnt-dependent manner (Schlesinger et al., 1999; Goldstein et al., 2006). We  
337 therefore investigated how EMS avoids mechanical influences from cells other than P<sub>2</sub>. When

338 attached to a single bead, EMS cells underwent parallel division (Fig. S1D). In addition, when  
339 attached to a bead on one side and to ABxx cells (i.e., a pair of ABa or ABp daughters) on the  
340 other, EMS cells still underwent parallel division relative to the bead (Fig. 7B). However, when  
341 attached to a bead on one side and P<sub>2</sub> on the other, EMS division axes were randomized relative  
342 to the bead (Fig. 7B and Movie S8). Furthermore, EMS cells attached to a bead on one side and  
343 P<sub>2</sub> isolated from Wnt mutants on the other underwent parallel division (Fig. 7B and Movie S8).  
344 These results suggest that contact with P<sub>2</sub> cancels the mechanical influence on cell division axes  
345 in a Wnt-dependent manner.

346 We next analyzed the influence of Wnt signaling on myosin dynamics. Upon attachment  
347 to a bead and ABxx or P<sub>2</sub> from Wnt mutants, myosin movements became asymmetric between  
348 B1 and B2 regions but not in U1 and U2 regions, leading to local flow asymmetries (Fig. 7C, D,  
349 G and Movie S8). However, attachment to a bead and a P<sub>2</sub> cell yielded asymmetric myosin  
350 velocities for both U1-U2 and B1-B2 that generated global flow asymmetry (Fig. 7C, D, G, and  
351 Movie S8). Notably, myosin foci were always faster and had a longer lifetime in the cortex  
352 proximal to the P<sub>2</sub> cell in the presence of Wnt (Figs. 7C, D and S6A and Movie S8), suggesting  
353 that Wnt instructively activates myosin activity.

354 To determine if Wnt activates myosin, we analyzed myosin II distribution and RLC  
355 phosphorylation. In both *in vivo* and *in vitro* experiments, localization of myosin II was  
356 diminished in the region proximal to P<sub>2</sub>, whereas that of p-RLC was more symmetric (Figs. 7E  
357 and S6B). Consequently, the level of p-RLC per myosin II—indicative of active myosin—was  
358 higher in the proximal cortex (Fig. 7E). Attachment to P<sub>2</sub> cells from a Wnt mutant abolished  
359 myosin II asymmetry, causing myosin activity to become symmetric (Fig. 7E). Taken together,  
360 these results demonstrate that the Wnt signal is a cue that induces myosin activity asymmetry



361 along an axis proximal-distal to Wnt-expressing cells. Unlike local myosin flow asymmetry  
362 induced by the physical contact, the Wnt-dependent global myosin flow asymmetry does not  
363 generate torque toward the contact site, probably because it moves cell surface of U1-U2 and B1-  
364 B2 regions in the same direction, resulting in orientation of EMS cell division toward P<sub>2</sub> even in  
365 the presence of multiple other contact sites (Fig. 7G, orange arrows in the right panel).

366

## 367 **Discussion**

368 In this study, we have discovered a cell division orientation mechanism that is  
369 independent of known microtubule-dynein pathways, using the well-established *C. elegans*  
370 model for cell division orientation but focusing on less studied cell types. We found that the 2-  
371 cell stage AB cell underwent oriented division independently of microtubule pulling forces. We  
372 identified physical contact with cells or bead acts as the upstream cue that orients AB cell  
373 division through downregulation of myosin activity. As a consequence, myosin equatorial flow  
374 became asymmetric in the region proximal to the contact site, while symmetric in the distal  
375 region, creating a local actomyosin flow asymmetry. By tracking cell surface movements, we  
376 showed that actomyosin flow is a force generator. Based on these data, we concluded that locally  
377 asymmetric cell surface movements generate a directional torque that orients cell division in  
378 parallel to the contact site. Notably, we found that a similar myosin-dependent mechanosensitive  
379 mechanism also operates in mouse 2-cell stage embryos. Furthermore, in later stage *C. elegans*  
380 embryos, additional cues such as contact asymmetry or Wnt signaling generate polarized  
381 actomyosin flows to specify a left-right oriented ABa cell division and an anterior-posterior  
382 oriented EMS cell division, respectively. Overall, our study demonstrates that cortical  
383 actomyosin flow is a cell-nonautonomously tunable force generation mechanism that orients cell

384 division along different axes. In concert with microtubule pulling forces, tunable actomyosin  
385 flow may specify diverse division axis *in vivo*.

386 Our results provide the first examples of extrinsic control of actomyosin flow in dividing  
387 cells. The molecular mechanism of mechanosensitive actomyosin regulation in this system  
388 remains unclear. For example, we do not know how physical contact inhibits RLC  
389 phosphorylation. Extracellular control of actomyosin flow has also been reported in migrating  
390 cells, where a chemoattractant gradient acts through receptors to generate retrograde actomyosin  
391 flow toward the trailing end of cells (Devreotes and Horwitz, 2015). Rho GTPases such as Rac,  
392 Cdc42, and RhoA are actomyosin regulators critical for correct cell migration with spatio-  
393 temporally distinct activities within cells (Fritz and Pertz, 2016). As knock-down of RGA-  
394 3/RhoGAP resulted in the abnormal AB cell division, physical contact-induced myosin  
395 regulation may act through Rho GTPases in our system. However, we did not detect bead  
396 induced changes in RhoA and Cdc42 activities using GFP reporters that bind to their substrates,  
397 potentially due to their high cytoplasmic signals (data not shown; Kumfer et al., 2010; Tse et al.,  
398 2012). Development of cell surface specific reporters may allow more precise analysis.  
399 Alternatively, physical contact may directly inhibit myosin by exerting resistive forces; a  
400 previous single molecule study showed that purified myosin II molecules prematurely detached  
401 from F-actin and exhibited smaller working stroke when resistive forces were exerted (Capitani  
402 et al., 2012). Notably, we showed that myosin lost the ability to respond to the contact site after  
403 knock-down of CUL-3 E3 ubiquitin ligase; thus future identification of CUL-3 substrates might  
404 shed light on the molecular details of mechanosensitive myosin regulation.

405 Since cells are usually surrounded by others from which they receive multiple cues, it is  
406 difficult to identify the cue that orients cell division in a multicellular system. Although

407 reductionist approaches such as cell ablation or conditional protein knock-down play important  
408 roles in identifying cell-cell communications, reconstitution of multicellular physical and  
409 chemical environments enabled us to directly test the requirements for candidate cues. We have  
410 shown that cell-sized carboxylate-modified polystyrene beads are simple yet useful tools for  
411 examining the effects of physical contact on cell division. These chemically functionalized beads  
412 can also be modified with signaling molecules such as Wnt ligand (Habib et al., 2013). Although  
413 embryo micro-manipulations currently are demanding experiments, the future development of  
414 automated systems that spatially positions the cells with respect to properly designed beads  
415 would enable the systematic investigation of how different mechanical and chemical cues affect  
416 cell division in reconstituted three dimensional multicellular environments.

417         In this study, we uncovered the mechanism of 4-cell stage embryo architecture formation  
418 that is conserved between *C. elegans* and mouse, and potentially in human. These 4-cell stage  
419 architectures are significant for the further development of these animals: the diamond shape in  
420 *C. elegans* establishes the D-V axis, while the tetrahedron shape in mouse and human embryos  
421 promotes more successful *in vitro* fertilization outcomes than do other patterns (Cauffman et al.,  
422 2014; Ebner et al., 2012; Graham and Deussen, 1978; Suzuki et al., 1995) (Fig. 5C). Moreover,  
423 the tetrahedron and diamond shapes in mouse embryos are associated with distinct pluripotency  
424 factor activities and gene expression profiles among blastomeres (Goolam et al., 2016; Torres-  
425 Padilla et al., 2007; White et al., 2016). We also have shown that a mechanosensitive myosin  
426 pathway operates in both *C. elegans* and mouse embryos to orient cell division. In addition, this  
427 mechanism coordinately works with extracellular material such as eggshell or zona-pellucida to  
428 establish 4-cell stage architecture. Interestingly, zona-pellucida free 2-cell stage human embryos  
429 also appear to undergo cell division in parallel to cell contact (Bodri et al., 2015). Therefore, this

430 newly identified oriented division mechanism may also function in human embryos. While  
431 extrinsic control is not known, actomyosin regulation at the 4-cell stage is associated with  
432 developmental delay or arrest in human embryos (Wong et al., 2010) and left-right body  
433 asymmetry in *C. elegans*, snail, and frog embryos (Natanathan et al., 2014; Davison et al., 2016).  
434 Thus, precise actomyosin regulation at the 4-cell stage may play central roles in early  
435 embryogenesis among Bilateria, and further studies of extrinsic actomyosin regulation would  
436 potentially contribute to our understanding of human multicellular assembly processes.

437         In a broader perspective, our results suggest that different patterns of cell contact between  
438 cells of distinct sizes and fates arising during embryogenesis function as unique mechanical and  
439 chemical cues that control actomyosin flow and cell division to produce diverse axis orientations.  
440 Indeed, *C. elegans* is remarkable in having an invariant lineage of division axis orientation  
441 (Sulston et al., 1983), and reproducible patterns of cell contact provide a potentially simple  
442 explanation for how this invariance is achieved. By examining the roles of each cell-cell contact  
443 on the orientation of unexplored cell divisions, future studies may uncover new types of cell  
444 division regulators, and reveal how sequences of contact pattern-dependent oriented divisions  
445 contribute to the generation of multicellular architecture throughout development.

446

#### 447 **Author contributions**

448 Conceptualization, K. S.; Methodology, K. S.; Formal Analysis, K. S.; Investigation, K. S.;  
449 Writing – Original Draft, K. S. and B. B.; Writing – Review & Editing, K. S. and B. B.;  
450 Visualization, K. S.; Funding Acquisition, K. S. and B. B.; Supervision, B. B.

451

## 452 **Acknowledgments**

453 We thank Ute Hostick and University of Oregon transgenic mouse facility for providing mouse  
454 embryos, Paul Mains, Tony Hyman and the *Caenorhabditis* Genetics Center (funded by the NIH  
455 Office of Research Infrastructure Programs; P40 OD010440) for *C. elegans* strains, Akatsuki  
456 Kimura for helpful discussion, Kryn Stankunas and Chris Doe for sharing lab equipment, and  
457 Chris Doe for critical reading of the manuscript. This work was supported by the NIH grant  
458 R01GM049869 to B.B. and Human Frontier Science Program (LT000345/2012-L) to K.S.  
459

## 460 **References**

- 461 1. Adelstein, R. S. and Conti, A. M. (1975). Phosphorylation of platelet myosin increases actin-  
462 activated myosin ATPase activity. *Nature* **256**, 597–598.
- 463 2. Basto, R., Lau, J., Vinogradova, T., Gardiol, A., Woods, C. G., Khodjakov, A., Raff, J. W.  
464 (2006). Flies without centrioles. *Cell* **125**, 1375-1386.
- 465 3. Bazzi, H., Anderson, K. V. (2014). Acentriolar mitosis activates a p53-dependent apoptosis  
466 pathway in the mouse embryo. *Proc. Natl. Acad. Sci. U. S. A.* **111**, E1491-E1500.
- 467 4. Bodri, D., Kato, R., Kondo, M., Hosomi, N., Katsumata, Y., Kawachiya, S., Matsumoto, T.  
468 (2015). Time-lapse monitoring of zona pellucida-free embryos obtained through *in vitro*  
469 fertilization: a retrospective case series. *Fertil. Steril.* **103**, e35.
- 470 5. Bosveld, F., Markova, O., Martin, C., Wang, Z., Pierre, A., Gaugue, I., Ainslie, A.,  
471 Christophorou, N., Lubensky, D. K., Minc, N., Bellaïche, Y. (2016). Epithelial tricellular  
472 junctions act as interphase cell shape sensors to orient mitosis. *Nature* **530**, 495-498.
- 473 6. Bray, D. and White, J. G. (1988). Cortical flow in animal cells. *Science* **239**, 883–888.
- 474 7. Brenner, S. (1974). The genetics of *Caenorhabditis elegans*. *Genetics* **77**, 71-94.
- 475 8. Campinho, P., Behrndt, M., Ranft, J., Risler, T., Minc, N., Heisenberg, C. P. (2013).  
476 Tension-oriented cell divisions limit anisotropic tissue tension in epithelial spreading during  
477 zebrafish epiboly. *Nat. Cell Biol.* **15**, 1405-1411.
- 478 9. Capitanio, M., Canepari, M., Maffei, M., Beneventi, D., Monico, C., Vanzi, F., Bottinelli, R.,  
479 Pavone, F. S. (2012). Ultrafast force-clamp spectroscopy of single molecules reveals load  
480 dependence of myosin working stroke. *Nat. Methods* **9**, 1013-1019.

- 481 10. Carvalho, A., Olson, S. K., Gutierrez, E., Zhang, K., Noble, L. B., Zanin, E., Desai, A.,  
482 Groisman, A., Oegema, K. (2011). Acute drug treatment in the early *C. elegans* embryo.  
483 *PloS One* **6**, e24656.
- 484 11. Case, L. B. and Waterman, C. M. (2015). Integration of actin dynamics and cell adhesion by  
485 a three-dimensional, mechanosensitive molecular clutch. *Nat. Cell Biol.* **17**, 955-963.
- 486 12. Cauffman, G., Verheyen, G., Tournaye, H., Van de Velde, H. (2014). Developmental  
487 capacity and pregnancy rate of tetrahedral- versus non-tetrahedral-shaped 4-cell stage human  
488 embryos. *J. Assist. Reprod. Genet.* **31**, 427-34.
- 489 13. Craig, R., Smith, R., Kendrick-Jones, J. (1983). Light-chain phosphorylation controls the  
490 conformation of vertebrate non-muscle and smooth muscle myosin molecules. *Nature* **302**,  
491 436–439.
- 492 14. Devreotes, P. and Horwitz, A.R. (2015). Signaling networks that regulate cell migration.  
493 *Cold Spring Harb. Perspect. Biol.* **7**, a005959.
- 494 15. Davison, A., McDowell, G. S., Holden, J. M., Johnson, H. F., Koutsovoulos, G. D., Liu, M.  
495 M., Hulpiau, P., Van Roy, F., Wade, C. M., Banerjee, R., et al. (2016). Formin Is Associated  
496 with Left-Right Asymmetry in the Pond Snail and the Frog. *Curr. Biol.* **26**, 654–660.
- 497 16. di Pietro, F., Echard, A., Morin, X. (2016). Regulation of mitotic spindle orientation: an  
498 integrated view. *EMBO Rep.* **17**, 1106-30.
- 499 17. Ebner, T., Maurer, M., Shebl, O., Moser, M., Mayer, R. B., Duba, H. C., Tews, G. (2012).  
500 Planar embryos have poor prognosis in terms of blastocyst formation and implantation.  
501 *Reprod. Biomed. Online* **25**, 267-72.
- 502 18. Edgar, L. G. (1995). Blastomere culture and analysis. *Method Cell Biol* **48**, 303-321.

- 503 19. Egger, B., Boone, J. Q., Stevens, N. R., Brand, A. H., Doe, C. Q. (2007). Regulation of  
504 spindle orientation and neural stem cell fate in the *Drosophila* optic lobe. *Neural Dev.* **2**, 1.
- 505 20. Fink, J., Carpi, N., Betard, A., Chebah, M., Azioune, A., Bornens, M., Sykes, C., Fetler, L.,  
506 Cuvelier, D., Piel, M. (2011). External forces control mitotic spindle positioning. *Nat. Cell*  
507 *Biol.* **13**, 771-778.
- 508 21. Fritz, R. D., Pertz, O. (2016). The dynamics of spatio-temporal Rho GTPase signaling:  
509 formation of signaling patterns. *Fl000Research* **5**, 749.
- 510 22. Goolam, M., Scialdone, A., Graham, S. J., Macaulay, I. C., Jedrusik, A., Hupalowska, A.,  
511 Voet, T., Marioni, J. C., Zernicka-Goetz, M. (2016). Heterogeneity in Oct4 and Sox2 Targets  
512 Biases Cell Fate in 4-Cell Mouse Embryos. *Cell* **165**, 61-74.
- 513 23. Goldstein, B., Takeshita, H., Mizumoto, K., Sawa, H. (2006). Wnt signals can function as  
514 positional cues in establishing cell polarity. *Dev. Cell* **10**, 391-396.
- 515 24. Graham, C. F. and Deussen, Z. A. (1978). Features of cell lineage in preimplantation mouse  
516 development. *J. Embryol. Exp. Morph.* **48**, 53-72.
- 517 25. Habib, S. J., Chen, B. C., Tsai, F. C., Anastassiadis, K., Meyer, T., Betzig, E., Nusse, R.  
518 (2013). A localized Wnt signal orients asymmetric stem cell division *in vitro*. *Science* **339**,  
519 1445–1448.
- 520 26. Hammer, Ø., Harper, D. A. T., Ryan, P. D. (2001). PAST: Paleontological statistics software  
521 package for education and data analysis. *Palaeontol. Electron.* **4**, 9pp, [http://palaeo-](http://palaeo-electronica.org/2001_1/past/issue1_01.htm)  
522 [electronica.org/2001\\_1/past/issue1\\_01.htm](http://palaeo-electronica.org/2001_1/past/issue1_01.htm).
- 523 27. Hao, Y., Du, Q., Chen, X., Zheng, Z., Balsbaugh, J. L., Maitra, S., Shabanowitz, J., Hunt, D.  
524 F., Macara, I. G. (2010). Par3 controls epithelial spindle orientation by aPKC-mediated  
525 phosphorylation of apical Pins. *Curr. Biol.* **20**, 1809-1818.



- 526 28. Kelly, S.J., Mulnard, J.G., and Graham, C.F. (1978). Cell division and cell allocation in early  
527 mouse development. *J. Embryol. Exp. Morphol.* **48**, 37–51.
- 528 29. Knoblich, J. (2010). Asymmetric cell division: recent developments and their implications  
529 for tumour biology. *Nat Rev Mol Cell Biol* **11**, 849-860.
- 530 30. Kumfer, K. T., Cook, S. J., Squirrell, J. M., Eliceiri, K. W., Peel, N., O’Connell, K. F., White,  
531 J. G. (2010). CGEF-1 and CHIN-1 regulate CDC-42 activity during asymmetric division in  
532 the *Caenorhabditis elegans* embryo. *Mol. Biol. Cell* **21**, 266–277.
- 533 31. Kurz, T., Pintard, L., Willis, J. H., Hamill, D. R., Gönczy, P., Peter, M., Bowerman, B.  
534 (2002). Cytoskeletal regulation by the Nedd8 ubiquitin-like protein modification pathway.  
535 *Science* **295**, 1294-1298.
- 536 32. Kwon, M., Bagonis, M., Danuser, G., Pellman, D. (2015). Direct Microtubule-Binding by  
537 Myosin-10 Orients Centrosomes toward Retraction Fibers and Subcortical Actin Clouds.  
538 *Dev. Cell* **34**, 323-337.
- 539 33. Levayer, R. and Lecuit, T. (2012). Biomechanical regulation of contractility: Spatial control  
540 and dynamics. *Trends Cell Biol.* **22**, 61–81.
- 541 34. Louvet-Vallee, S., Vinot, S., Maro, B. (2005). Mitotic spindles and cleavage planes are  
542 oriented randomly in the two-cell mouse embryo. *Curr. Biol.* **15**, 464-9.
- 543 35. Lu, C. and Mains, P. E. (2005). Mutations of a redundant  $\alpha$ -tubulin gene affect  
544 *Caenorhabditis elegans* early embryonic cleavage via MEI-1/katanin-dependent and -  
545 independent pathways. *Genetics* **170**, 115-126.
- 546 36. Mayer, M., Depken, M., Bois, J. S., Jülicher, F., Grill, S. W. (2010). Anisotropies in cortical  
547 tension reveal the physical basis of polarizing cortical flows. *Nature* **467**, 617–621.

- 548 37. Minc, N., Burgess, D., Chang, F. (2011). Influence of cell geometry on division-plane  
549 positioning. *Cell* **144**, 414-426.
- 550 38. Murthy, K. and Wadsworth, P. (2005). Myosin-II-dependent localization and dynamics of F-  
551 actin during cytokinesis. *Curr. Biol.* **15**, 724–731.
- 552 39. Naganathan, S. R., Furthauer, S., Nishikawa, M., Julicher, F., Grill, S. W. (2014). Active  
553 torque generation by the actomyosin cell cortex drives left-right symmetry breaking. *eLife* **3**,  
554 e04165.
- 555 40. Nestor-Bergmann, A., Goddard, G., Woolner, S. (2014). Force and the spindle: mechanical  
556 cues in mitotic spindle orientation. *Semin. Cell Dev. Biol.* **34**, 133-139.
- 557 41. Noatynska, A., Gotta, M., Meraldi, P. (2012). Mitotic spindle (DIS) orientation and DISease:  
558 Cause or consequence? *J. Cell Biol.* **199**, 1025-1035.
- 559 42. Park, F. D. and Priess, J. R. (2003). Establishment of POP-1 asymmetry in early *C. elegans*  
560 embryos. *Development* **130**, 3547-3556.
- 561 43. Pease, J. C. and Tirnauer, J. S. (2011). Mitotic spindle misorientation in cancer—out of  
562 alignment and into the fire. *J. Cell Sci.* **124**, 1007–1016.
- 563 44. Pintard, L., Willis, J. H., Willems, A., Johnson, J. L., Srayko, N., Kurz, T., Glaser, S.,  
564 Mains, P. E., Tyers, M., Bowerman, B., Peter, M. (2003). The BTB protein MEL-26 is a  
565 substrate-specific adaptor of the CUL-3 ubiquitin-ligase. *Nature* **425**, 311-316.
- 566 45. Priess, J. R. and Thomson, J. N. (1987). Cellular interactions in early *C. elegans* embryos.  
567 *Cell* **48**, 241-250.
- 568 46. Priess, J. R. (2005). Notch signaling in the *C. elegans* embryo. *WormBook*, ed. The *C.*  
569 *elegans* Research Community, WormBook, doi:10.1895/wormbook.1.4.1

- 570 47. Reymann, A. C., Staniscia, F., Erzberger, A., Salbreux, G., Grill, S. W. (2016). Cortical flow  
571 aligns actin filaments to form a furrow. *eLife* **5**, e17807.
- 572 48. Rocheleau, C. E., Downs, W. D., Lin, R., Wittmann, C., Bei, Y., Cha, Y. H., Ali, M., Priess,  
573 J. R., Mello, C. C. (1997). Wnt signaling and an APC-related gene specify endoderm in early  
574 *C. elegans* embryos. *Cell* **90**, 707–716.
- 575 49. Rose, L., Gönczy, P. (2014) Polarity establishment, asymmetric division and segregation of  
576 fate determinants in early *C. elegans* embryos. *WormBook*, ed. The *C. elegans* Research  
577 Community, WormBook, doi: 10.1895/wormbook.1.30.2
- 578 50. Roh-Johnson, M., Shemer, G., Higgins, C. D., McClellan, J. H., Werts, A. D., Tulu, U. S.,  
579 Gao, L., Betzig, E., Kiehart, D. P., Goldstein, B. (2012). Triggering a cell shape change by  
580 exploiting preexisting actomyosin contractions. *Science* **335**, 1232–1235.
- 581 51. Saitoh, M., Ishikawa, T., Matsushima, S., Naka, M., Hidaka, H. (1987). Selective inhibition  
582 of catalytic activity of smooth muscle myosin light chain kinase. *J. Biol. Chem.* **262**, 7796–  
583 7801.
- 584 52. Sawa, H., Korswagen H. C. (2013). Wnt signaling in *C. elegans*. *WormBook*, ed. The *C.*  
585 *elegans* Research Community, Wormbook, doi: 10.1895/wormbook.1.7.2
- 586 53. Schierenberg, E. and Junkersdorf, B. (1992). The role of eggshell and underlying vitelline  
587 membrane for normal pattern formation in the early *C. elegans* embryo. *Roux's Arch. Dev.*  
588 *Biol.* **202**, 10-16.
- 589 54. Schindelin, J., Arganda-Carreras, I., Frise, E., Kaynig, V., Longair, M., Pietzsch, T.,  
590 Preibisch, S., Rueden, C., Saalfeld, S., Schmid, B., Tinevez, J. Y., White, D. J., Hartenstein,  
591 V., Eliceiri, K., Tomancak, P., Cardona, A. (2012). Fiji: an open-source platform for  
592 biological-image analysis. *Nat. Methods* **9**, 676-682.

- 593 55. Schlesinger, A., Shelton, C., Maloof, J., Meneghini, M., Bowerman, B. (1999). Wnt pathway  
594 components orient a mitotic spindle in the early *Caenorhabditis elegans* embryo without  
595 requiring gene transcription in the responding cell. *Genes Dev.* **13**, 2028-2038.
- 596 56. Scholey, J. M., Taylor, K. A., Kendrick-Jones, J. (1980). Regulation of non-muscle myosin  
597 assembly by calmodulin-dependent light chain kinase. *Nature* **287**, 233–235.
- 598 57. Schonegg, S., Constantinescu, A. T., Hoegge, C., Hyman, A. A. (2007). The Rho GTPase-  
599 activating proteins RGA-3 and RGA-4 are required to set the initial size of PAR domains in  
600 *Caenorhabditis elegans* one-cell embryos. *Proc. Natl. Acad. Sci.* **104**, 14976–14981.
- 601 58. Seldin, L., Poulson, N. D., Foote, H. P., Lechler, T. (2013). NuMA localization, stability, and  
602 function in spindle orientation involve 4.1 and Cdk1 interactions. *Mol. Biol. Cell* **24**, 3651–  
603 3662.
- 604 59. Shelton, C. A. and Bowerman, B. (1996). Time-dependent responses to *glp-1*-mediated  
605 inductions in early *C. elegans* embryos. *Development* **122**, 2043-2050.
- 606 60. Siller, K. H. and Doe, C. Q. (2009). Spindle orientation during asymmetric cell division. *Nat.*  
607 *Cell. Biol.* **11** 365-374.
- 608 61. Singh, D. and Pohl, C. (2014). Coupling of rotational cortical flow, asymmetric midbody  
609 positioning, and spindle rotation mediates dorsoventral axis formation in *C. elegans*. *Dev.*  
610 *Cell* **28**, 253-267.
- 611 62. Sonnichsen, B., *et al.* (2005). Full-genome RNAi profiling of early embryogenesis in  
612 *Caenorhabditis elegans*. *Nature* **434**, 462-9.
- 613 63. Srinivasan, D. G., Fisk, R. M., Xu, H., van den Heuvel, S. (2003). A complex of LIN-5 and  
614 GPR proteins regulates G protein signaling and spindle function in *C. elegans*. *Genes Dev.*  
615 **17**, 1225-1239.

- 616 64. Sulston, J. E. and Horvitz, H. R. (1977). Post-embryonic cell lineages of the nematode,  
617 *Caenorhabditis elegans*. *Dev. Biol.* **56**, 110-156.
- 618 65. Sulston, J. E., Schierenberg, E., White, J. G., and Thomson, J. N. (1983). The embryonic cell  
619 lineage of the nematode *Caenorhabditis elegans*. *Dev. Biol.* **100**, 64–119.
- 620 66. Suzuki, H., Togashi, M., Adachi, J., Toyoda, Y. (1995). Developmental ability of zona-free  
621 mouse embryos is influenced by cell association at the 4-cell stage. *Biol. Reprod.* **53**, 78-83.
- 622 67. Thorpe, C. J., Schlesinger, A., Carter, J. C., Bowerman, B. (1997). Wnt signaling polarizes  
623 an early *C. elegans* blastomere to distinguish endoderm from mesoderm. *Cell* **90**, 695–705.
- 624 68. Torres-Padilla, M. E., Parfitt, D. E., Kouzarides, T., Zernicka-Goetz, M. (2007). Histone  
625 arginine methylation regulates pluripotency in the early mouse embryo. *Nature* **445**, 214-8.
- 626 69. Tse, Y. C., Werner, M., Longhini, K. M., Labbe, J. C., Goldstein, B., Glotzer, M. (2012).  
627 RhoA activation during polarization and cytokinesis of the early *Caenorhabditis elegans*  
628 embryo is differentially dependent on NOP-1 and CYK-4. *Mol. Biol. Cell* **23**, 4020–4031.
- 629 70. Uehara, R., Goshima, G., Mabuchi, I., Vale, R. D., Spudich, J. A., Griffis, E. R. (2010).  
630 Determinants of myosin II cortical localization during cytokinesis. *Curr. Biol.* **20**, 1080–  
631 1085.
- 632 71. Vicente-Manzanares, M., Ma, X., Adelstein, R.S., Horwitz, A.R. (2009). Non-muscle myosin  
633 II takes centre stage in cell adhesion and migration. *Nat. Rev. Mol. Cell Biol.* **10**, 778–790.
- 634 72. White, M. D., Angiolini, J. F., Alvarez, Y. D., Kaur, G., Zhao, Z. W., Mocskos, E., Bruno,  
635 L., Bissiere, S., Levi, V., Plachta, N. (2016). Long-Lived Binding of Sox2 to DNA Predicts  
636 Cell Fate in the Four-Cell Mouse Embryo. *Cell* **165**, 75-87.
- 637 73. Williams, S.E., Fuchs, E. (2013) Oriented divisions, fate decisions. *Curr Opin Cell Biol* **25**,  
638 749-758.

- 639 74. Williams, S. E., Ratliff, L. A., Postiglione, M. P., Knoblich, J. A., Fuchs, E. (2014). Par3-  
640 mInsc and G $\alpha$ i3 cooperate to promote oriented epidermal cell divisions through LGN. *Nat.*  
641 *Cell Biol.* **16**, 758-769.
- 642 75. Wilson, E. B. (1925). *The Cell in Development and Heredity*. (New York: The MacMillan  
643 Company).
- 644 76. Wong, C. C., Loewke, K. E., Bossert, N. L., Behr, B., De Jonge, C. J., Baer, T. M., Pera, R.  
645 A. R. (2010). Non-invasive imaging of human embryos before embryonic genome activation  
646 predicts development to the blastocyst stage. *Nat. Biotech.* **28**, 1115-1121.
- 647 77. Wu, M., Smith, C. L., Hall, J. A., Lee, I., Luby-Phelps, K., Tallquist, M. D. (2010).  
648 Epicardial spindle orientation controls cell entry into the myocardium. *Dev. Cell* **19**, 114-125.
- 649 78. Yamamoto, K., Kimura, A. (2017). An anisropic attraction model for the diversity and  
650 robustness of cell arrangement in nematodes. *bioRxiv* 132654. doi:  
651 <https://doi.org/10.1101/132654>
- 652 79. Yumura, S., Ueda, M., Sako, Y., Kitanishi-Yumura, T., Yanagida, T. (2008). Multiple  
653 mechanisms for accumulation of myosin II filaments at the equator during cytokinesis.  
654 *Traffic* **9**, 2089–2099.
- 655 80. Zhou, M. and Wang, Y. L. (2008). Distinct pathways for the early recruitment of myosin II  
656 and actin to the cytokinetic furrow. *Mol. Biol. Cell* **19**, 318–326.
- 657 81. Zonies, S., Motegi, F., Hao, Y., Seydoux, G. (2010). Symmetry breaking and polarization of  
658 the *C. elegans* zygote by the polarity protein PAR-2. *Development* **137**, 1669–1677.
- 659  
660

661

662

663 **Figure legends**

664 **Figure 1.** A microtubule-independent mechanosensitive mechanism orients AB blastomere

665 division during D-V body axis establishment.

666 (A) The 4-cell stage architecture establishes the *C. elegans* D-V body axis (See text). (B)

667 Orientation of AB and P<sub>1</sub> cell divisions. Centrosomes (green), histone H2B (magenta), and cell

668 outlines (white dotted line) are shown along with the distribution of division axes (middle

669 panels) and D-V axis orientation (bottom panels). (C) Myosin accumulation in the nocodazole-

670 treated cells. Non-muscle myosin II (green), centrosomes (white), and histones (magenta) are

671 shown along with cleavage furrow position (bottom). (D) Orientation of AB cell division after

672 attachment to P<sub>1</sub> cells or beads. Myosin (green), centrosomes (green), histones (magenta), and

673 beads (magenta) are shown along with the distribution of division axes (bottom). Scale bars = 10

674  $\mu\text{m}$ .

675

676 **Figure 2.** Myosin activity regulates mechanosensitive AB division axis orientation.

677 (A) Abnormal AB division axis in *cul-3*(RNAi). Centrosomes (green), histone H2B (magenta),

678 and cell outlines (white dotted lines) are shown along with the distribution of division axes

679 (middle panel) and D-V axis orientations (bottom panel). (B) Myosin localization during AB cell

680 division. Myosin (green) and histones (magenta) are shown. (C) Diagram of myosin II

681 regulation. (D) Ratio of equatorial to polar cortical myosin intensity. P values were calculated by

682 one-way ANOVA with Holm-Sidak's multiple comparisons test. **\*\*P < 0.01.** (E) AB division

683 axis orientations in *rga-3*(RNAi). (F) AB division axis orientation after ML-7 treatment. Myosin

684 (green), centrosomes (white), and histones (magenta) are shown along with the distribution of

685 mitotic spindle orientations (bottom). (G) Orientation of AB division relative to the bead after  
686 drug treatment. Myosin (green), centrosomes (white), histones (magenta), and beads (magenta)  
687 are shown; arrowheads indicate centrosome positions. Distributions of mitotic spindle  
688 orientations or cleavage furrows are shown in the right panels. Scale bars = 10  $\mu\text{m}$ .

689

690 **Figure 3.** Mechanosensitive induction of anisotropic actomyosin flow triggers cell surface  
691 movements.

692 (A) Movements of non-muscle myosin II/NMY-2 foci during AB cell division. Isolated AB cells  
693 with or without bead attachment and control or *cul-3*(RNAi) embryos. Myosin foci tracks for 50  
694 s are shown in left panel. In the right panel, color of arrows indicate the tracks from different  
695 samples. The cell quadrant was defined as indicated. In the cells with no contact, regions  
696 exhibited slowest myosin velocities are B2 for convenience of comparison. (B, C) Velocities of  
697 NMY-2 foci in x and y axes of the cell defined in A. (D) Clutch engagement transmits flow  
698 forces to the cell surface (see text). (E) Cell surface movements during oriented AB division.  
699 Movements of 0.35- $\mu\text{m}$  particles attached to the membrane (arrowheads) and their velocities are  
700 shown along with myosin (green) and beads (white dotted line). P values were calculated by one-  
701 way ANOVA with Holm-Sidak's multiple comparisons tests. Scale bars = 10  $\mu\text{m}$ .

702

703 **Figure 4.** Mechanosensitive inhibition of myosin RLC phosphorylation generates anisotropic  
704 actomyosin flow.

705 (A) Myosin foci movements during oriented AB division in response to beads of different sizes.

706 Arrowheads and arrows indicate myosin foci and their total displacement, respectively. (B)

707 Relationship between myosin foci velocity and attached bead diameter. (C) Relationship between



708 myosin foci velocity and myosin foci lifetime. (D) Myosin foci lifetime in response to beads or  
709 different myosin activities. (E) p-RLC-dependent myosin foci formation. (F) Cortex-to-  
710 cytoplasm ratio of myosin intensity. (G) Contact-dependent changes in p-RLC localization.  
711 Arrowheads indicate the cell or bead contact site. (H) Pathway diagram of contact-dependent  
712 myosin flow control (see text). Scale bars = 10  $\mu\text{m}$ . P values were calculated by one-way  
713 ANOVA with Holm-Sidak's multiple comparisons test. \*P < 0.05, \*\*P < 0.01, \*\*\*P < 0.0001;  
714 n.s., not significant (P > 0.05).

715

716

717 **Figure 5.** Mechanosensitive myosin pathway orients cell division in *C. elegans* and mouse  
718 embryos to establish 4-cell stage architecture.

719 (A) Oriented AB cell division in mouse 2-cell stage embryos. The distributions of division axes  
720 is shown at the bottom. (B) Contact-induced changes in p-RLC localization. p-RLC localizations  
721 are shown as heat map. Arrowheads indicate contact sites. (C) 4-cell architecture after CD cell  
722 division. (D) Effects of initial P<sub>1</sub> (metaphase) and CD (onset of cell elongation) division axis  
723 orientation and extracellular material on multicellular architecture formation.  $\alpha$ , Angle of P<sub>1</sub>/CD  
724 division relative to the contacting cell. (E) Common mechanism underlying mouse and *C.*  
725 *elegans* 4-cell architecture formation (see text). Scale bars = 10  $\mu\text{m}$ .

726

727 **Figure 6.** Asymmetry in cell contact size polarizes aomyosin flow to orient left-right division.

728 (A) ABa cell division at the 4-cell stage and recapitulation of contact asymmetry using beads.  
729 (B) Effects of contact size asymmetry on ABa cell division axis. (C, D) Myosin foci movements  
730 during ABa cell division. Arrowheads and arrows in C indicate myosin foci and their total

731 displacement, respectively. Velocities are shown in D. (E) Polarized p-RLC localization in  
732 response to asymmetric-sized contacts. Myosin (green), p-RLC (magenta), cell or bead outlines  
733 (white dotted lines), and polarized p-RLC (arrowheads) are shown. (F) Ratio of active myosin  
734 intensities between opposite halves of cells. Active myosin intensity was determined as the ratio  
735 of p-RLC to myosin intensity. Scale bars = 5  $\mu$ m. P values in B were determined with the  
736 Fisher's exact test and those in D and F were calculated by one-way ANOVA with Holm-Sidak's  
737 multiple comparisons test. \*P < 0.05, \*\*P < 0.01, \*\*\*P < 0.0001; n.s., not significant (P > 0.05).

738

739

740 **Figure 7.** Extracellular Wnt signal polarizes actomyosin flow that abolishes mechanosensitive  
741 effects.

742 (A) Asymmetric EMS division at the 6-cell stage is oriented toward P<sub>2</sub> cells in the presence of  
743 multiple contacts. (B) Ignorance of beads contact induced by a Wnt signal from P<sub>2</sub> cell. Myosin  
744 (green), centrosomes (green), histones (magenta), beads (magenta), and EMS division axis  
745 (arrows) are shown. P<sub>2</sub>(-Wnt) indicates the P<sub>2</sub> cell isolated from Wnt mutants. (C, D) Myosin  
746 foci velocities (C) and movements (D) during EMS division. Arrowheads and arrows indicate  
747 myosin foci and their total displacement, respectively. (E) Wnt-dependent polarization of active  
748 myosin localization. Myosin (green), p-RLC (magenta), cell or bead boundaries (white dotted  
749 lines), and P<sub>2</sub> cells (yellow dotted lines) are shown. Proximal-distal ratio of active myosin  
750 calculated similarly to Figure 6F is shown at the bottom. (G) Model of local actomyosin flow  
751 asymmetry oriented division and its abrogation by global flow asymmetry. Myosin (black  
752 arrows) and cell surface (orange arrows) movements are shown. P values were determined by

753 one-way ANOVA with Holm-Sidak's multiple comparisons test in C and by a paired t test in E.

754 Scale bars = 10  $\mu$ m.

755

756 **Figure S1.** Related to Figure 1. Oriented AB division is independent of known microtubule-

757 dynein pathways and other embryonic cells also respond to bead contact.

758 (A) Cell aspect ratio of indicated cells. Except for isolated AB cell with bead, cells within

759 eggshell were quantified. P-values were calculated by one-way ANOVA with Holm-Sidak's

760 multiple comparisons test. (B) Orientation of cell long axes. P<sub>1</sub> cell has strong bias in transverse

761 axis while AB is not biased. (C) AB and P<sub>1</sub> division axes after treatment with 12.5 ng/ml

762 nocodazole. Centrosomes (green/white), histones (magenta), and cell outlines (white lines) are

763 shown. Distributions of AB division axes at anaphase and those of P<sub>1</sub> at metaphase are shown

764 schematically. (D) Bead contact-induced oriented division in other cell types. The distribution of

765 division axes after cytokinesis is shown as angular plots. Scale bars = 10  $\mu$ m.

766

767 **Figure S2.** Related to Figure 2. Oriented AB division is actomyosin-dependent.

768 (A) Randomized AB division axes after treatment with ML-7 or latrunculin A. The distribution

769 of AB and P<sub>1</sub> division axes is shown schematically. (B) Normal bead contact-dependent oriented

770 AB division upon LGN knockdown or in mutants of cytokinesis. Arrowheads indicate

771 centrosome positions. Angular plots indicate AB division axes after cell cycle exit (as evaluated

772 by histone decondensation). Myosin (green), centrosomes (white/green), bead (magenta), and

773 histones (magenta) are shown.

774

775 **Figure S3.** Related to Figure 2. CUL-3-MEL-26 E3 ubiquitin ligase complex regulates the AB  
776 division axis independent of MEI-1 function.

777 (A) Schematic illustrations of genetic backgrounds used in this study. CUL-3/Cullin forms an E3  
778 ubiquitin ligase complex with BTB protein MEL-26, RBX-1 and E2 enzyme to ubiquitylate  
779 substrate proteins. The CUL-3-MEL-26 complex regulates the degradation of the meiosis-  
780 specific microtubule-severing protein MEI-1 during the oocyte-to-embryo transition to allow  
781 formation of a normal mitotic spindle. Upon *cul-3* or *mel-26* knock-down or in degradation-  
782 defective *mei-1(ct46)* mutants, ectopic MEI-1 protein activity during mitosis causes the  
783 formation of abnormally small spindles with short microtubules (middle panel). However, when  
784 *tba-2(sb25)* and *tbb-2(sb26)* mutations are introduced ( $\alpha$ -tubulin and  $\beta$ -tubulin alleles,  
785 respectively), microtubules become resistant to ectopic MEI-1 protein activity (Lu and Mains,  
786 2005) and normal mitotic spindle formation is restored (bottom panel). In *cul-3*(RNAi) embryos,  
787 AB spindle orientation is defective in the *tba-2(sb25);tbb-2(sb26)* background, suggesting that  
788 this phenotype results from a failure in degradation of an unknown target. (B) Viability and AB  
789 spindle orientation after *cul-3* knockdown are independent of ectopic MEI-1 function. Eggs were  
790 laid by adult worms for around 6 h and hatched and dead embryos were counted to assess  
791 viability. Note that the degradation-defective mutant *mei-1(ct46)* showed 0% viability in a wild-  
792 type background (Lu and Mains, 2005), which was completely rescued to the wild-type level in  
793 the *tba-2(sb25);tbb-2(sb26)* background. Low viability and abnormal AB spindle orientation in  
794 *cul-3*(RNAi) and *mel-26*(RNAi) embryos suggest that CUL-3 and MEL-26 function as a  
795 complex to regulate the degradation of unknown targets other than MEI-1 protein. The weak  
796 phenotype in *mel-26*(RNAi) suggests that there are other BTB proteins involved in this process.

797 A, P, and D in the graph indicate anterior, posterior, and dorsal sides, respectively. P values were

798 calculated with the Watson-Williams test for equal means ( $n = 18, 19, 15,$  and  $16$  from left to  
799 right).

800

801 **Figure S4.** Related to Figure 3. Y axis myosin foci velocities after contact with a bead.

802 Velocities were determined as in Figure. 3C. P values were calculated by one-way ANOVA with  
803 Holm-Sidak's multiple comparisons test.

804

805 **Figure S5.** Related to Figure 5. Contact-dependent reduction of RLC phosphorylation.

806 Left schematics indicate the cellular regions used for the quantification of phospho-RLC signals.  
807 In isolated cells, area between equator and pole are used as control area. Right graph shows the  
808 ratio of p-RLC signal between control and polar area in no contact and contact site and polar area  
809 in the presence of physical contact. P values were calculated by one-way ANOVA with Holm-  
810 Sidak's multiple comparisons test.

811

812 **Figure S6.** Related to Figure 7. Polarized myosin foci lifetime and intensity in the presence of  
813 Wnt signal.

814 (A) Polarized myosin foci lifetime on the cortex of cell halves proximal and distal to the  $P_2$  cell.

815 (B) Polarized myosin localization in the presence of Wnt. Heat maps of myosin GFP signal  
816 intensity are shown. White lines in the left panel indicate EMS cells and white dotted lines in the  
817 middle and right panels indicate beads. P values were calculated by one-way ANOVA with  
818 Holm-Sidak's multiple comparisons test. \* $P < 0.05$ , \*\* $P < 0.01$ , \*\*\* $P < 0.0001$ ; n.s., not  
819 significant ( $P > 0.05$ ). Scale bars =  $10 \mu\text{m}$ .

820

821 **Movie S1.** Physical contact-dependent oriented AB cell division.

822 Centrosomes, myosin (green), chromosomes (magenta), and beads (magenta) after cell-cell or  
823 cell-bead recombination (15 s per frame).

824

825 **Movie S2.** Physical contact-induced anisotropic myosin flow.

826 Cortical myosin foci movements in a 3D reconstruction (left) or maximum projection with  
827 correction of cell rotation/movements (right) are shown for cells with or without bead  
828 attachment. Movie loops three times (5 s per frame in the movie on the right).

829

830 **Movie S3.** Equatorial actomyosin flow specifically becomes asymmetric proximal to contact.

831 Cortical myosin foci movements were tracked in 3D and shown as ball. Left and right movies are  
832 from same sample showing distal and proximal side relative to the contact site, respectively.

833

834 **Movie S4.** Physical contact-induced anisotropic cell surface movements.

835 Cortical myosin (green), beads (magenta, at the bottom of the image), and cell surface particles  
836 (magenta) after AB-bead contact. The movie loops three times (5 s per frame).

837

838 **Movie S5.** Physical contact-dependent oriented mouse AB/CD cell division.

839 Differential interference contrast (DIC) movies of intact mouse embryos (left), zona-free  
840 embryos (left, marked with circles), and isolated AB/CD blastomeres attached to a bead (right)  
841 (5 min per frame).

842

843 **Movie S6.** Extracellular material-dependent cell rotation prevents perpendicular P<sub>1</sub>/CD cell  
844 division.

845 DIC movies of an intact *C. elegans* embryo (upper left), eggshell-free *C. elegans* embryo (lower  
846 left), intact mouse embryo (upper right), and zona-free mouse embryo (lower right). In the  
847 presence of extracellular material, dividing *C. elegans* AB cells or in mouse CD cells rotates  
848 toward the cell contact.

849 **Movie S7.** Asymmetric-sized contacts induces polarized myosin flow.

850 Surface myosin (green), chromosomes (magenta), and beads (magenta) are shown. Bottom  
851 panels show myosin movement after correction of cell movement/rotations. The movie loops  
852 three times (5 s per frame).

853

854 **Movie S8.** Wnt-induced polarized myosin flow.

855 Surface myosin (green), chromosomes (magenta), and beads (magenta) are shown. Bottom  
856 panels show myosin movement after correction of cell movement/rotation. The movie loops  
857 three times (5 s per frame).

858

859

860

861 **STAR Methods**

862

863 **Key Resource Table**

864 Provided as a separate file

865

866 **Contact for Reagent and Resource Sharing**

867 Lead contact information:

868 Kenji Sugioka, Institute of Molecular Biology, University of Oregon

869 [sugioka@uoregon.edu](mailto:sugioka@uoregon.edu)

870 Lead contact holds responsibility for responding to requests and providing reagents and  
871 information.

872

873 **Experimental Model and Subject Details**

874 *Mus musculus* (mouse) and *Caenorhabditis elegans* strains were used in this study. To obtain

875 mouse embryos, female C57BL/6J in 3-12 week old were superovulated by intraperitoneal

876 injections of 5 international unit (IU) of Pregnant Mare Serum Gonadotropin (PMSG) followed

877 by 5 IU of Human Chorionic Gonadotropin (hCG) 48 hours later. Each females was then placed

878 with a C57BL/6J or B6.Cg-Tg(HIST1H2BB/EGFP)1Pa/J male (The Jackson Laboratory)

879 overnight and all females were checked for a copulation plug the following morning. Two-cell

880 stage embryos were collected by flushing oviducts with FHM medium and cultured in

881 EmbryoMax Advanced KSOM medium (EMD Millipore) under 37°C, 5% CO<sub>2</sub>, and 5% O<sub>2</sub>.

882 All *C. elegans* strains except for temperature sensitive mutants were cultured at 25°C as

883 described (Brenner, 1974). *zen-4(or153ts)* temperature sensitive mutants were cultured at 15°C

884 before experiments. The following transgenes were used: *ddl299* (YFP::SPD-5, centrosome



885 marker, a gift from Tony Hyman), *itIs37* (mCherry::histone H2B), *zuIs45* (NMY-2::GFP, non-  
886 muscle myosin II), *cp13[nmy-2::GFP + LoxP]* (non-muscle myosin II), *xsSi5[GFP::ani-*  
887 *I*(AH+PH); RhoA biosensor], and *ojIs40[mGFP::wsp-1, CDC-42 biosensor]*. Some strains carry  
888 the viable  $\alpha$ -tubulin and  $\beta$ -tubulin gene mutations *tba-2(sb25)* and *tbb-2(sb26)* (Lu and Mains,  
889 2005), respectively (gifts from Paul Mains), to suppress *cul-3(RNAi)* defects in early stage (see  
890 Figure S3).

891

892

## 893 **Method Details**

### 894 **Suppression of early *cul-3* knock-down defects in worm embryos**

895 CUL-3/Cullin and its adaptor binding partner MEL-26/BTB are E3 ubiquitin ligase components  
896 required for degradation of the meiosis-specific microtubule severing protein MEI-1/katanin, and  
897 *cul-3(RNAi)* results in abnormal mitotic spindles with short microtubules and associated early  
898 embryonic cell division defects, and embryonic lethality (Figure S3) (Kurz et al., 2002; Pintard  
899 et al., 2003). However, the suppressor mutations *tba-2(sb25)* and *tbb-2(sb26)* almost fully rescue  
900 the lethality and cell division defects of a *mei-1* dominant mutation *ct46*, which encodes a  
901 degradation-defective form of MEI-1 (Figure S3A and S3B) (Lu and Mains, 2005). *tba-2(sb25)*  
902 and *tbb-2(sb26)* confer resistance to MEI-1-dependent microtubule severing without affecting  
903 normal mitosis (Lu and Mains, 2005). We therefore carried out all experiments in *tba-*  
904 *2(sb25);tbb-2(sb26)* mutant backgrounds to suppress early *cul-3(RNAi)* defects caused by ectopic  
905 MEI-1 function. Importantly, we confirmed that AB spindle orientation was normal in *mei-*  
906 *1(ct46); tba-2(sb25);tbb-2(sb26)* mutants, indicating that AB spindle orientation is regulated by  
907 the CUL-3-MEL-26 dependent degradation of unknown substrate(s) other than MEI-1 (Figure

908 S3B). The weaker phenotype of *mel-26(RNAi);tba-2(sb25);tbb-2(sb26)* embryos suggests that  
909 other BTB proteins redundantly regulate the degradation of the unknown substrate(s).

910

### 911 *C. elegans* RNAi

912 Feeding RNAi was performed for control, *cul-3*, *gpr-1/-2* and *perm-1* at 25°C. For control RNAi,  
913 a bacterial strain with empty vector (L4440) was used. For control and *gpr-1/-2* RNAi, L2 larvae  
914 were grown on the feeding RNAi plates and embryos were analyzed. For *cul-3* RNAi, L1 larvae  
915 were grown on the feeding RNAi plates and sterile F1 adults were crossed with RNAi males to  
916 obtain embryos for analysis. The sterile F1 adult worms have oocytes that appear normal but  
917 abnormally large sperm that probably failed to fully differentiate. For *perm-1* RNAi, L4 larvae  
918 were grown on the feeding RNAi plates for 10-14 hrs.

919

### 920 Polystyrene beads preparation

921 10 mg carboxyl-modified polystyrene beads at 30 µm diameter (KISKER BIOTECH GmbH &  
922 Co.), 20 µm, 10 µm, and 0.35 µm diameters (Polysciences) were washed twice with 100 mM 2-  
923 (N-morpholino)ethanesulfonic acid (MES) buffer (pH 6.5) and incubated with the 1 mL MES  
924 buffer containing 10 mg 1-Ethyl-3-(3-dimethylaminopropyl) carbodiimide (EDAC) for 15  
925 minutes at room temperature. The beads were washed twice with phosphate buffered saline  
926 (PBS) and incubated with the 0.5 mL PBS containing 0.05 µg Rhodamine Red-X succinimidyl  
927 ester (ThermoFisher Scientific) for 5 minutes. The beads were washed twice and stored with  
928 PBS at 4°C before use. Cells adhere to the beads either with or without poly-L-lysine coating,  
929 probably due to the interactions between carboxyl-modified bead and extracellular proteins or  
930 the electrostatic interactions between the negative charge of plasma membrane and positive

931 charge of Rhodamine. Therefore, all experiments except Fig. 2A were done without poly-L-  
932 lysine coating.

933

#### 934 **Blastomere isolation**

935 For *C. elegans* embryos, embryonic cells were isolated as described before (Edgar, 1995; Park et  
936 al., 2005), with the following modifications. After cutting the adult worms in egg salt buffer,  
937 embryos were placed in the freshly made hypochlorite solution [75 % Clorox (Clorox) and 2.5 N  
938 KOH] for 50 seconds. After washing with Shelton's growth medium twice (Shelton and  
939 Bowerman, 1996), embryos were put into the Shelton's medium on the coverslip with metallic  
940 holds. Eggshell and permeabilization barrier were removed by repeated mouth pipetting with a  
941 hand-drawn glass microcapillary tubes (10 microliters, Kimble Glass Inc.) to obtain eggshell and  
942 permeabilization barrier-free embryos. Although the permeabilization barrier is more important  
943 for cell architectures than eggshell (Schierenberg and Junkersdorf, 1992), we call these embryos  
944 eggshell-free embryos for simplicity. For blastomere isolation, 2-cell stage eggshell-free  
945 embryos were further drawn to separate the two cells. AB<sub>x</sub>, AB<sub>xx</sub>, EMS and P<sub>2</sub> cells were  
946 isolated by separating daughter cells after each cell division.

947 Two-cell stage mouse embryos were placed in M2 medium containing Tyrode's acid (Sigma-  
948 Aldrich) briefly to remove zona-pellucida. They were used as zona-free embryos or further  
949 separated by repeated mouth pipetting with a hand-drawn glass microcapillary tubes to obtain  
950 individual blastomere.

951

#### 952 **Cell-beads interaction assay**

953 Isolated cells at least before prometaphase were attached to either one or two polystyrene beads  
954 before imaging. For 1 cell-2 beads assay, 2 beads were combined initially and then attached to the  
955 isolated cell. For the surface particle tracking, cells were first coated with 0.35  $\mu\text{m}$  beads and  
956 then attached to the 30  $\mu\text{m}$  bead. All manipulations were done with the mouth pipette. For *zen-4*  
957 temperature sensitive mutants, isolated AB cells were prepared at 15 °C and incubated at 25 °C  
958 using a temperature controlled stage equipped with Leica DMI8 microscope (Leica) described  
959 below.

960

### 961 **Drug treatments**

962 For the drug treatments of *C. elegans* embryos surrounded by the eggshell (intact embryo), we  
963 performed *perm-1* RNAi to permeabilize the eggshell as previously described (Carvalho et al.,  
964 2011). Early 2-cell stage embryos were transferred to the Shelton's growth medium containing  
965 2% DMSO (control), 20  $\mu\text{M}$  Latrunculin A (Sigma-Aldrich), 200  $\mu\text{M}$  ML-7, 12.5 ng/mL  
966 Nocodazole (Sigma-Aldrich) and 20  $\mu\text{g/ml}$  Nocodazole.

967 For the drug treatments of *C. elegans* isolated blastomere, Shelton's growth medium containing  
968 200  $\mu\text{M}$  ML-7 (Sigma-Aldrich) and 20  $\mu\text{g/ml}$  Nocodazole (Sigma-Aldrich) were used.

969 For drug treatments of mouse blastomere, EmbryoMax Advanced KSOM medium containing 50  
970  $\mu\text{M}$  ML-7 was used.

971

### 972 **Live-imaging**

973 For worm cells with eggshell removed or permeabilized, metallic slides with a hole in the center  
974 were sandwiched between two coverslips and cells were mounted on one of the coverslip with  
975 Shelton's medium to avoid compression of the cell and dehydration. For other *C. elegans*

976 experiments, embryos were mounted on the 4% agar on the slide glass and sealed with a  
977 petroleum jelly (Vaselline) after placing coverslips. For mouse embryos, embryos in a drop of  
978 EmbryoMax Advanced KSOM medium covered with mineral oil on cell culture dish with glass  
979 bottom (FluoroDish, World Precision Instruments) were used for the imaging. For worm DIC  
980 movies, imaging was performed with generic CCD cameras mounted on either AxioPlan or  
981 AxioSkop (Zeiss). For worm fluorescence imaging, imaging was performed with a confocal unit  
982 CSU10 (Yokogawa electric) and an EMCCD camera Image EM (Hamamatsu photonics)  
983 mounted on an inverted microscope Leica DMI 4000 (Leica) or performed with a confocal unit  
984 CSU-W with Borealis (Andor) and an EMCCD camera iXon Ultra 897 (Andor) mounted on an  
985 inverted microscope Leica DMI8 (Leica). Both imaging systems were controlled by Metamorph  
986 (Molecular Devices). Samples were illuminated by diode-pumped lasers with 488 nm and 561nm  
987 wavelength. NMY-2::GFP, YFP::SPD-5 and mCherry::histone H2B signals were obtained every  
988 15 sec with 2  $\mu\text{m}$  Z spacing for most experiments. NMY-2::GFP, mCherry::histone H2B and  
989 0.35  $\mu\text{m}$  particle signals were obtained every 5 sec with 1.5  $\mu\text{m}$  Z spacing for the tracking of  
990 cortical movements in cell-bead experiments. NMY-2::GFP, mCherry::histone H2B signals were  
991 obtained every 10 sec with 1.5  $\mu\text{m}$  Z spacing for the tracking of cortical NMY-2 movements in  
992 intact embryos. For the live-imaging of mouse embryo, Nikon Eclipse Ti inverted fluorescence  
993 microscope (Nikon) equipped with Live Cell stage top incubation system (Pathology Devices)  
994 controlled by NIS Elements Advanced Research software was used. Embryos were maintained at  
995 37°C, 5% CO<sub>2</sub>, and 5% O<sub>2</sub> condition.

996

997 **Immunofluorescence**

998 Mouse or *C. elegans* embryos were fixed with 4% Paraformaldehyde in PBS for 15 mins. Fixed  
999 embryos were washed three times with PBS containing 1% Tween-20. Embryos were then  
1000 incubated with anti-phospho-myosin light chain (Ser19) antibody (1:50 dilution, #3671, Cell  
1001 Signaling Technology) in PBS containing 1% Bovine Serum Albumin (BSA) and 0.1% Tween-  
1002 20 at 4°C for overnight. After washing three times, samples were incubated with 1:500 anti-  
1003 rabbit Rhodamine Red-X (Jackson ImmunoResearch) for 2hrs at room temperatures. Mouse  
1004 embryos were imaged at 0.5  $\mu\text{m}$  Z spacing while those of worms were at 0.25  $\mu\text{m}$ .

1005

### 1006 **Image analysis**

1007 All images were analyzed with Fiji (Schindelin et al., 2012). For Fig. 1B and Fig. 2A, the  
1008 orientations of mitotic spindles were calculated from the angles between the line that crosses the  
1009 longitudinal axis (A-P) of the embryo and either AB or P<sub>1</sub> spindle using DIC movies. As AB cell  
1010 starts to rotate after late anaphase due to the eggshell, and also affects P<sub>1</sub> spindle orientation, we  
1011 measured the spindle orientations before the cell rotation. Therefore, AB spindle at anaphase and  
1012 P<sub>1</sub> spindle at metaphase were measured. D-V axes were measured from the angle between (i) the  
1013 line that passes the centroids of ABp and EMS nuclei at 4-cell stage and (ii) the A-P axis, using  
1014 DIC movies. For other experiments, spindle orientations relative to the plane of cell-bead or cell-  
1015 cell contact at indicated cell cycle stages were measured using the 3D reconstructed fluorescence  
1016 images. All angular data were analyzed with PAST software (Hammer et al., 2001). For the  
1017 quantification of myosin foci movements in the cell, cell position and orientation were corrected  
1018 by the image J plug-in StackReg, to eliminate the movements of myosin foci caused by the cell  
1019 movements or rotation. Supplemental Movies were made with Adobe Premiere Elements 15  
1020 (Adobe) or Imaris (Bitplane).

1021

1022 **Quantification and Statistical Analysis**

1023 Error bars indicate the mean  $\pm$  95% confidence interval. Statistical methods were described in  
1024 the Figure legends. Statistical analysis was performed using PAST software, Microsoft Excel  
1025 (Microsoft) and Prism 6 (GraphPad Software). \*P < 0.05, \*\*P < 0.01, \*\*\*P < 0.0001; n.s., not  
1026 significant (P > 0.05).

1027

# Figure 1 (Sugioka, Bowerman)

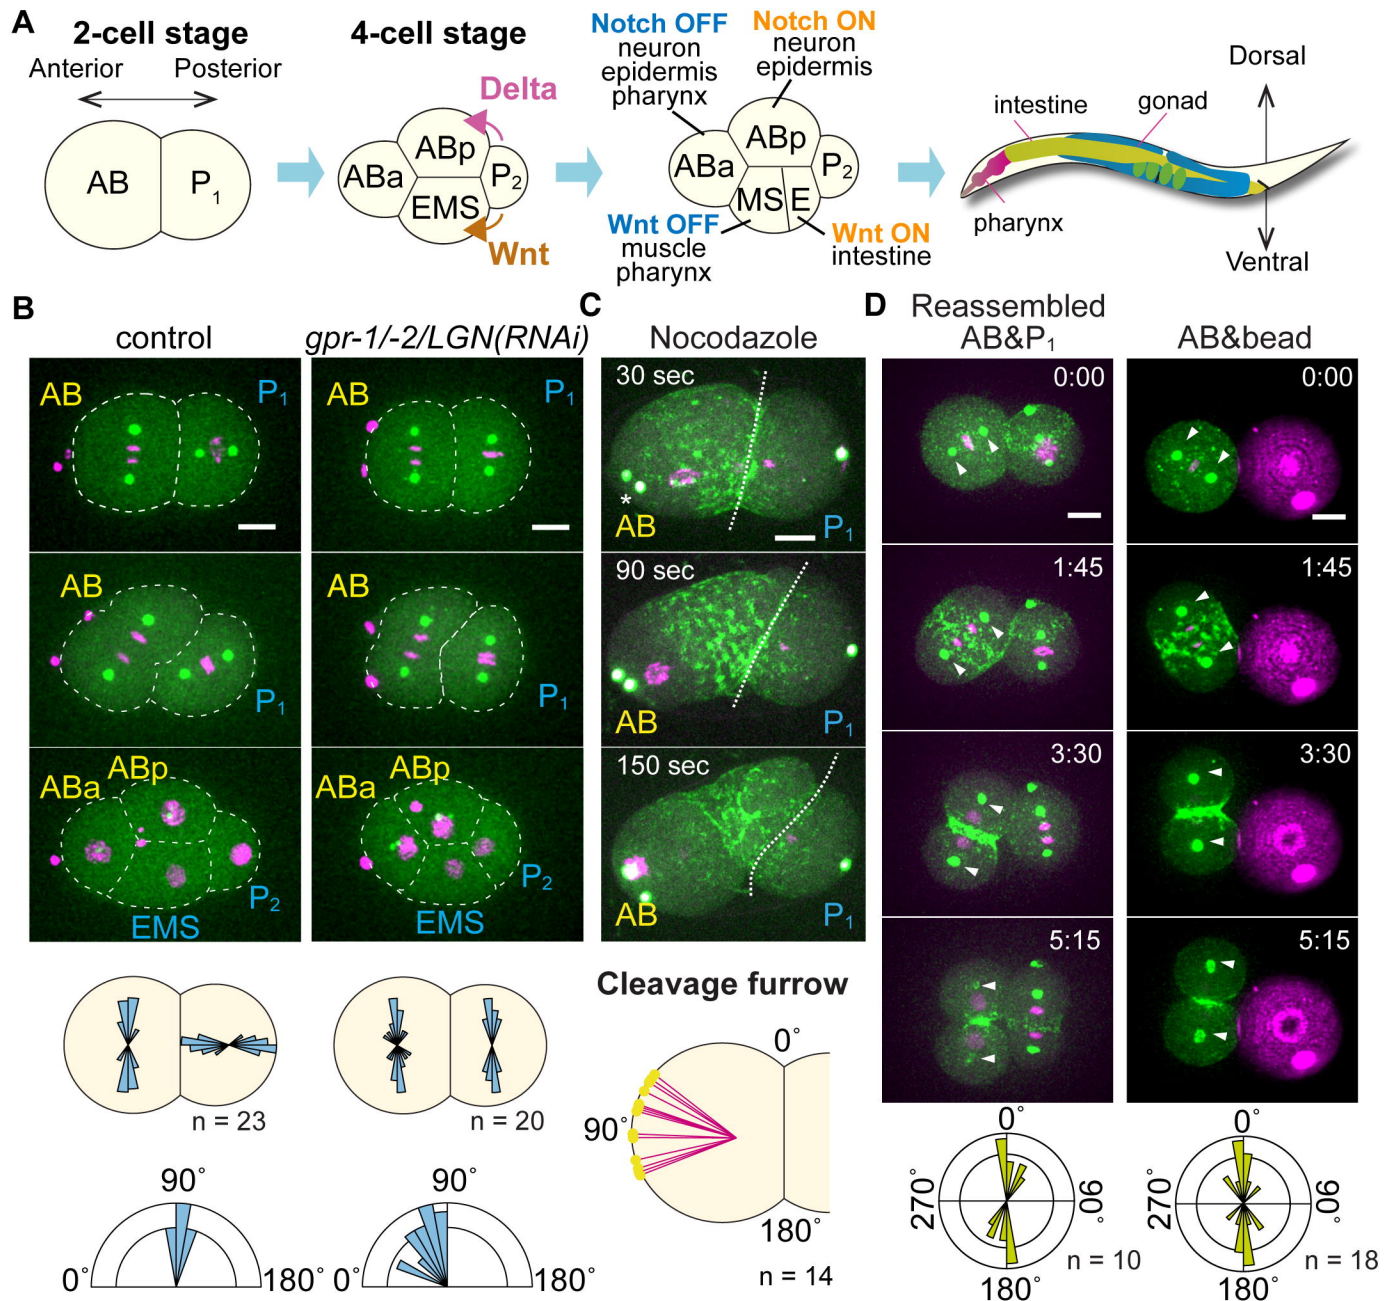

**Figure 1.** A microtubule-independent mechanosensitive mechanism orients AB blastomere division during D-V body axis establishment.

(A) The 4-cell stage architecture establishes the *C. elegans* D-V body axis (See text). (B) Orientation of AB and P<sub>1</sub> cell divisions. Centrosomes (green), histone H2B (magenta), and cell outlines (white dotted line) are shown along with the distribution of division axes (middle panels) and D-V axis orientation (bottom panels). (C) Myosin accumulation in the nocodazole-treated cells. Non-muscle myosin II (green), centrosomes (white), and histones (magenta) are shown along with cleavage furrow position (bottom). (D) Orientation of AB cell division after attachment to P<sub>1</sub> cells or beads. Myosin (green), centrosomes (green), histones (magenta), and beads (magenta) are shown along with the distribution of division axes (bottom). Scale bars = 10  $\mu$ m.



## Figure 2 (Sugioka, Bowerman)

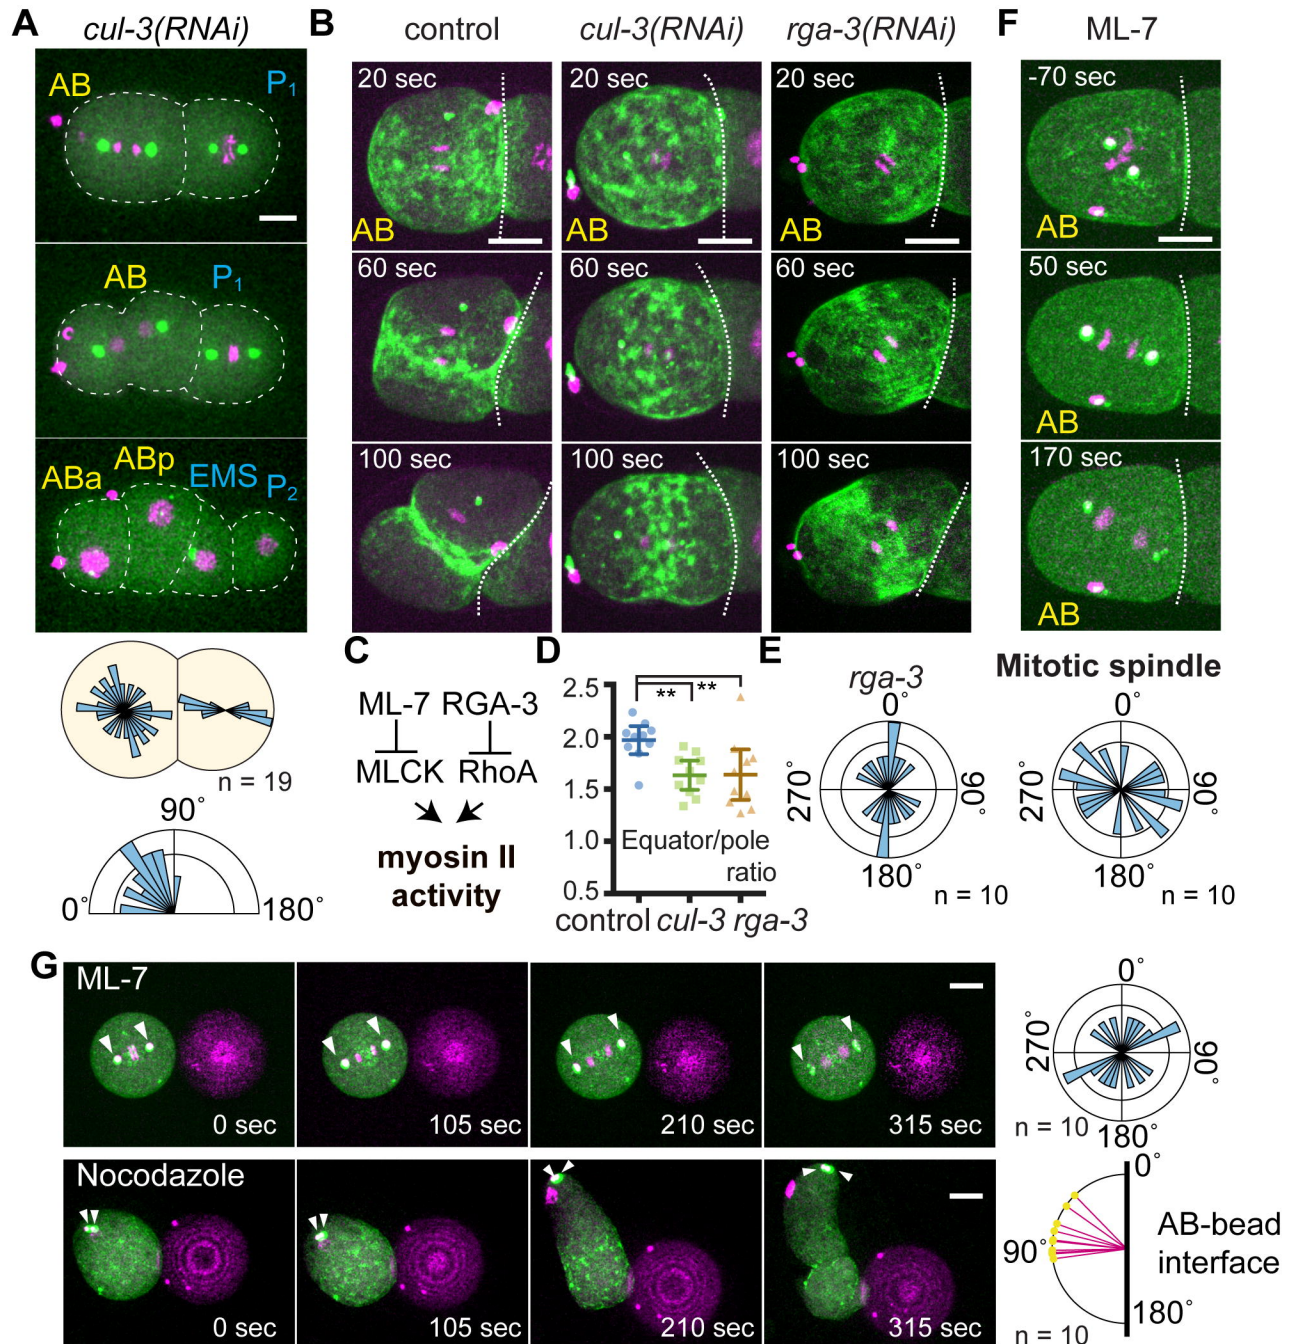

**Figure 2.** Myosin activity regulates mechanosensitive division axis orientation.

(A) Abnormal AB division axis in *cul-3(RNAi)*. Centrosomes (green), histone H2B (magenta), and cell outlines (white dotted lines) are shown along with the distribution of division axes (middle panel) and D-V axis orientations (bottom panel). (B) Myosin localization during AB cell division. Myosin (green) and histones (magenta) are shown. (C) Diagram of myosin II regulation. (D) Ratio of equatorial to polar cortical myosin intensity. P values were calculated by one-way ANOVA with Holm-Sidak's multiple comparisons test. \*\*P < 0.01. (E) AB division axis orientations in *rga-3(RNAi)*. (F) AB division axis orientation after ML-7 treatment. Myosin (green), centrosomes (white), and histones (magenta) are shown along with the distribution of mitotic spindle orientations (bottom). (G) Orientation of AB division relative to the bead after drug treatment. Myosin (green), centrosomes (white), histones (magenta), and beads (magenta) are shown; arrowheads indicate centrosome positions. Distributions of mitotic spindle orientations or cleavage furrows are shown in the right panels. Scale bars = 10 μm.

## Figure 3 (Sugioka, Bowerman)

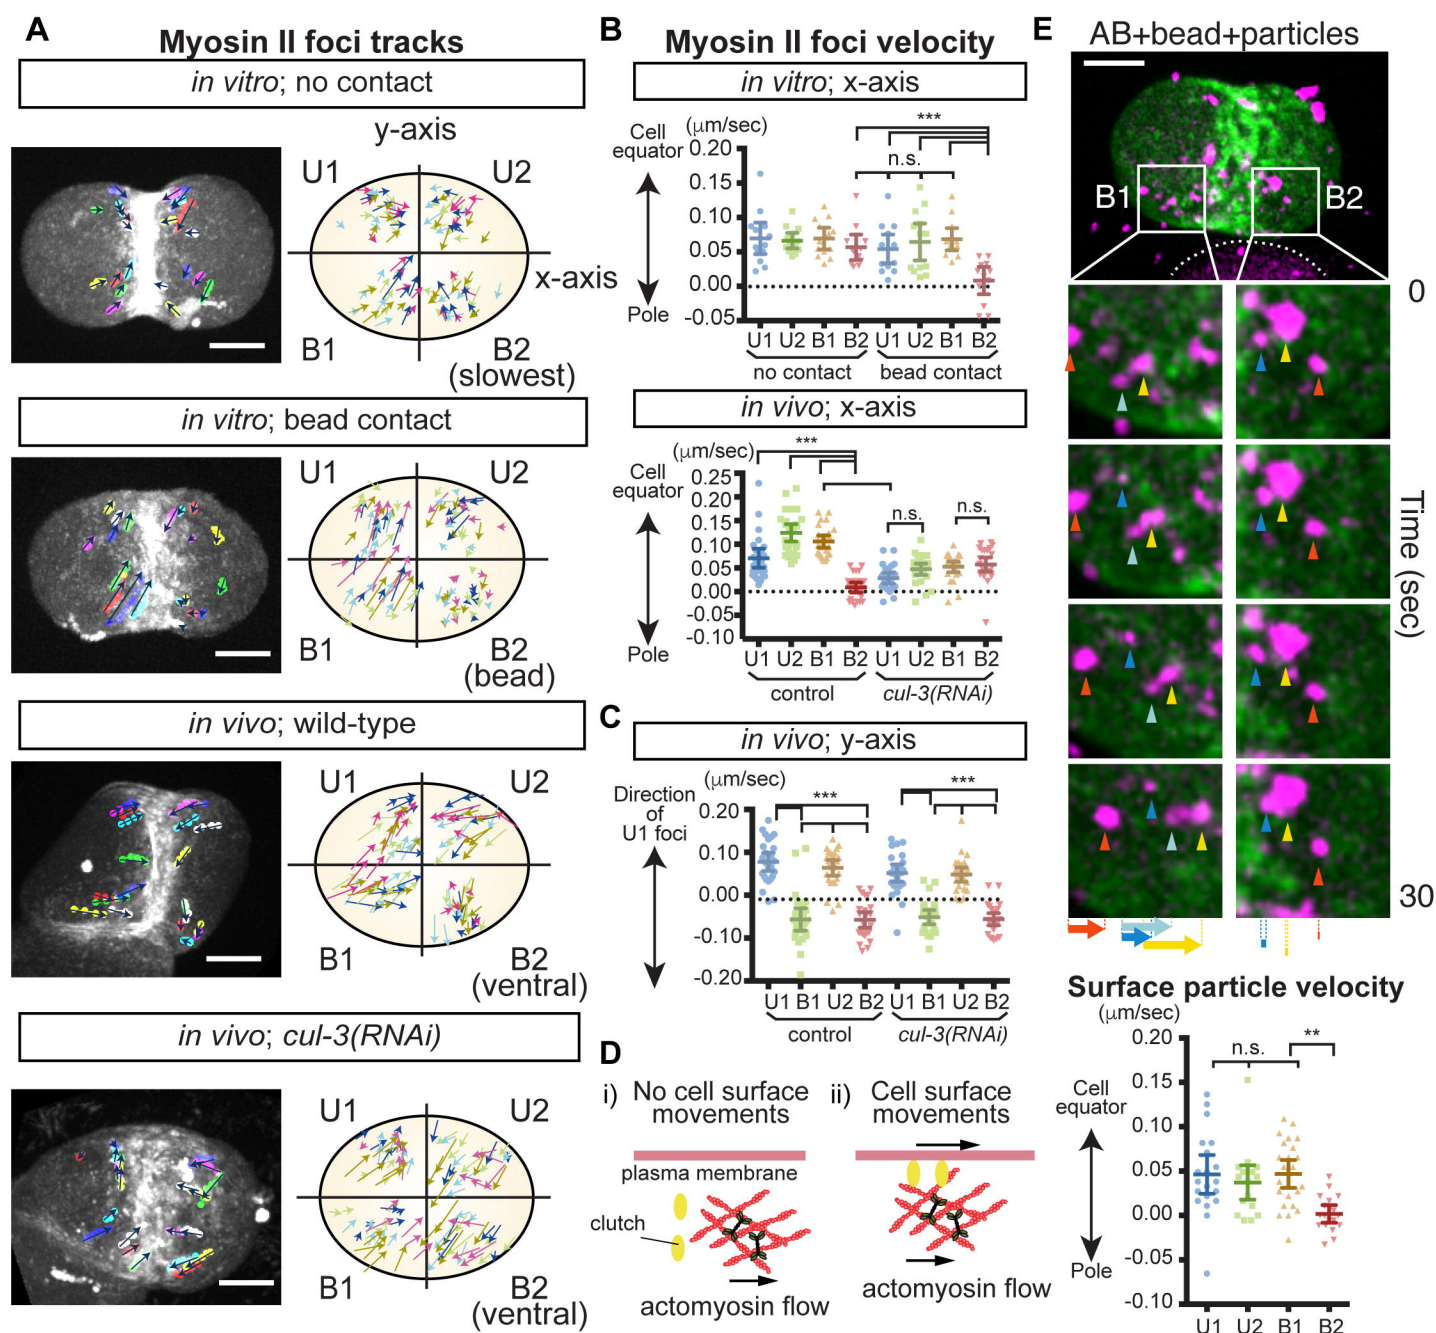

**Figure 3.** Mechanosensitive induction of anisotropic actomyosin flow triggers cell surface movements. (A) Movements of non-muscle myosin II/NMY-2 foci during AB cell division. Isolated AB cells with or without bead attachment and control or *cul-3(RNAi)* embryos. Myosin foci tracks for 50 s are shown in left panel. In the right panel, color of arrows indicate the tracks from different samples. The cell quadrant was defined as indicated. In the cells with no contact, regions exhibited slowest myosin velocities are B2 for convenience of comparison. (B, C) Velocities of NMY-2 foci in x and y axes of the cell defined in A. (D) Clutch engagement transmits flow forces to the cell surface (see text). (E) Cell surface movements during oriented AB division. Movements of 0.35- $\mu\text{m}$  particles attached to the membrane (arrowheads) and their velocities are shown along with myosin (green) and beads (white dotted line). P values were calculated by one-way ANOVA with Holm-Sidak's multiple comparisons tests. Scale bars = 10  $\mu\text{m}$ .

## Figure 4 (Sugioka, Bowerman)

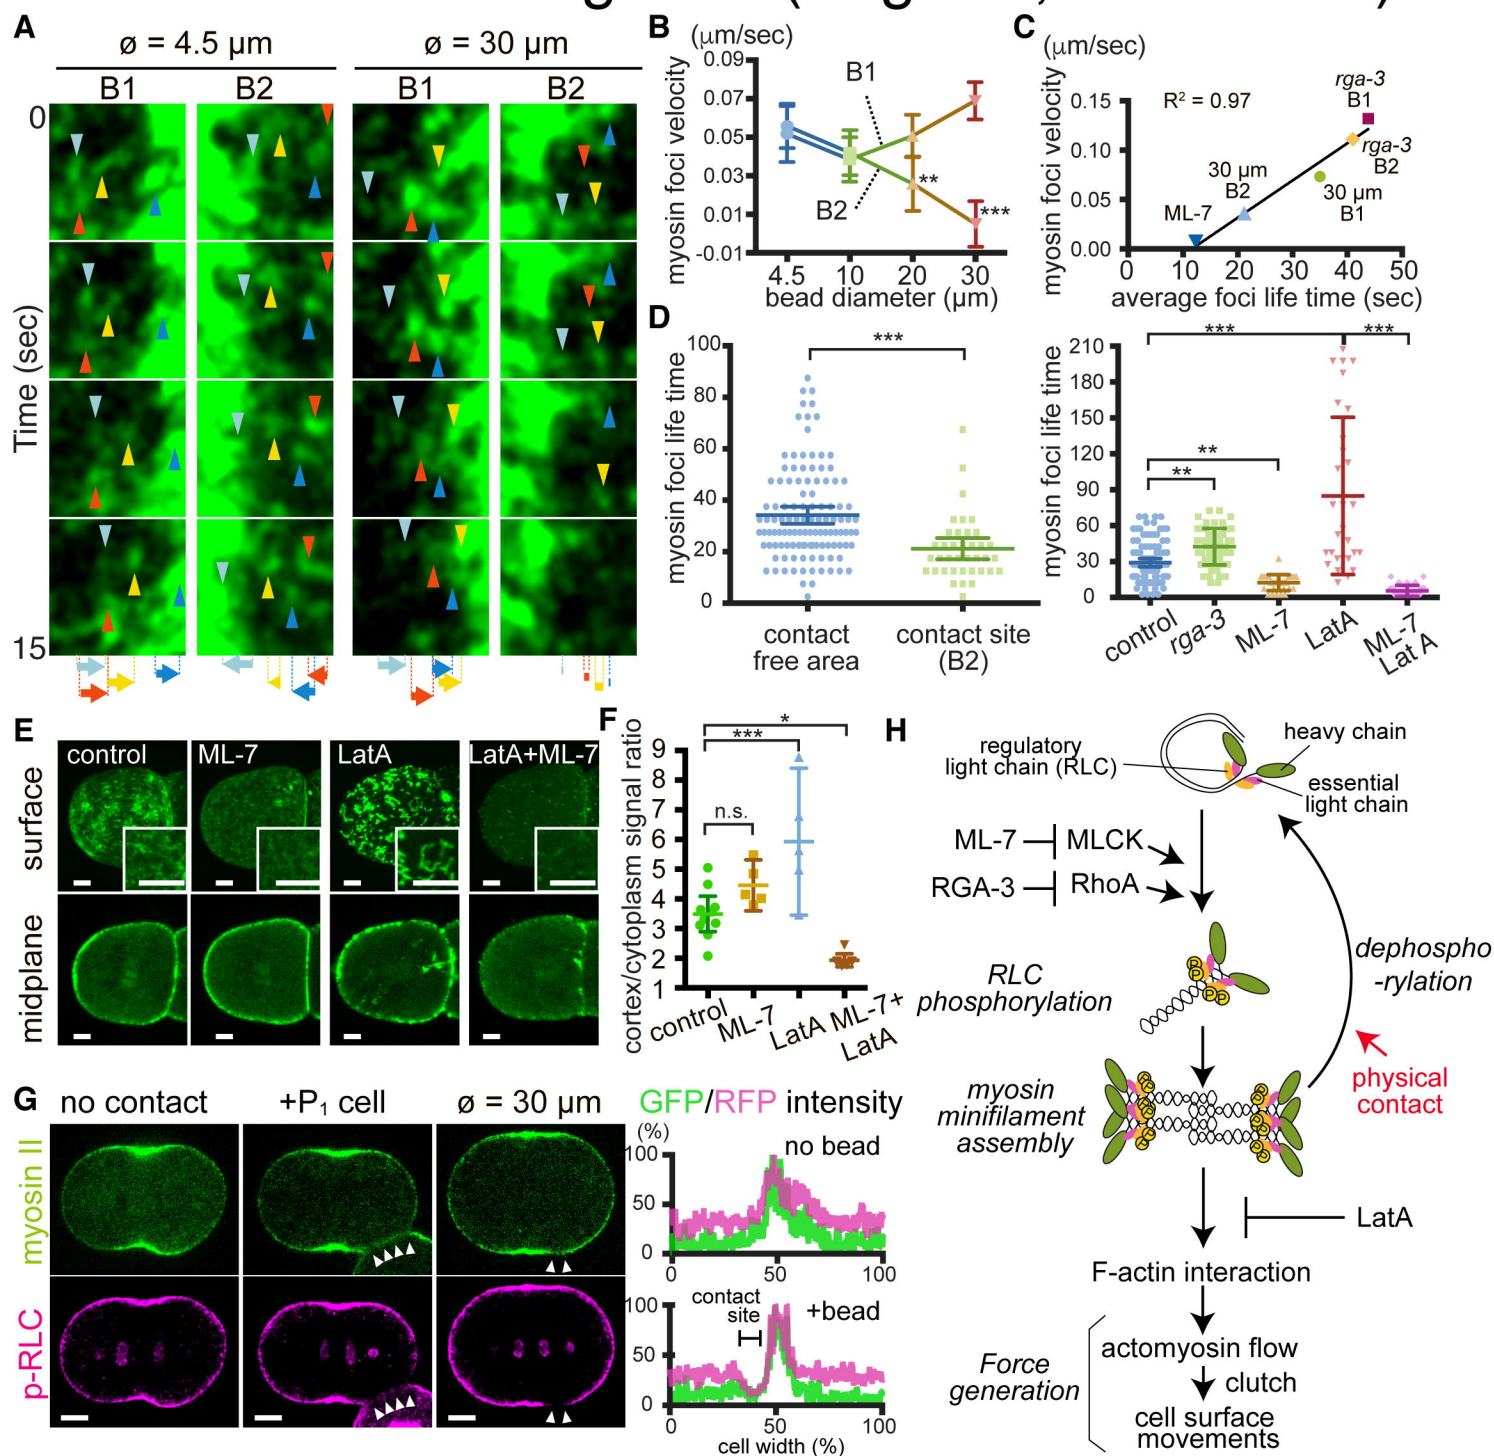

**Figure 4.** Mechanosensitive inhibition of myosin RLC phosphorylation generates anisotropic actomyosin flow. (A) Myosin foci movements during oriented AB division in response to beads of different sizes. Arrowheads and arrows indicate myosin foci and their total displacement, respectively. (B) Relationship between myosin foci velocity and attached bead diameter. (C) Relationship between myosin foci velocity and myosin foci lifetime. (D) Myosin foci lifetime in response to beads or different myosin activities. (E) p-RLC-dependent myosin foci formation. (F) Cortex-to-cytoplasm ratio of myosin intensity. (G) Contact-dependent changes in p-RLC localization. Arrowheads indicate the cell or bead contact site. (H) Pathway diagram of contact-dependent myosin flow control (see text). Scale bars = 10  $\mu$ m. P values were calculated by one-way ANOVA with Holm-Sidak's multiple comparisons test. \* $P < 0.05$ , \*\* $P < 0.01$ , \*\*\* $P < 0.0001$ ; n.s., not significant ( $P > 0.05$ ).

# Figure 5 (Sugioka, Bowerman)

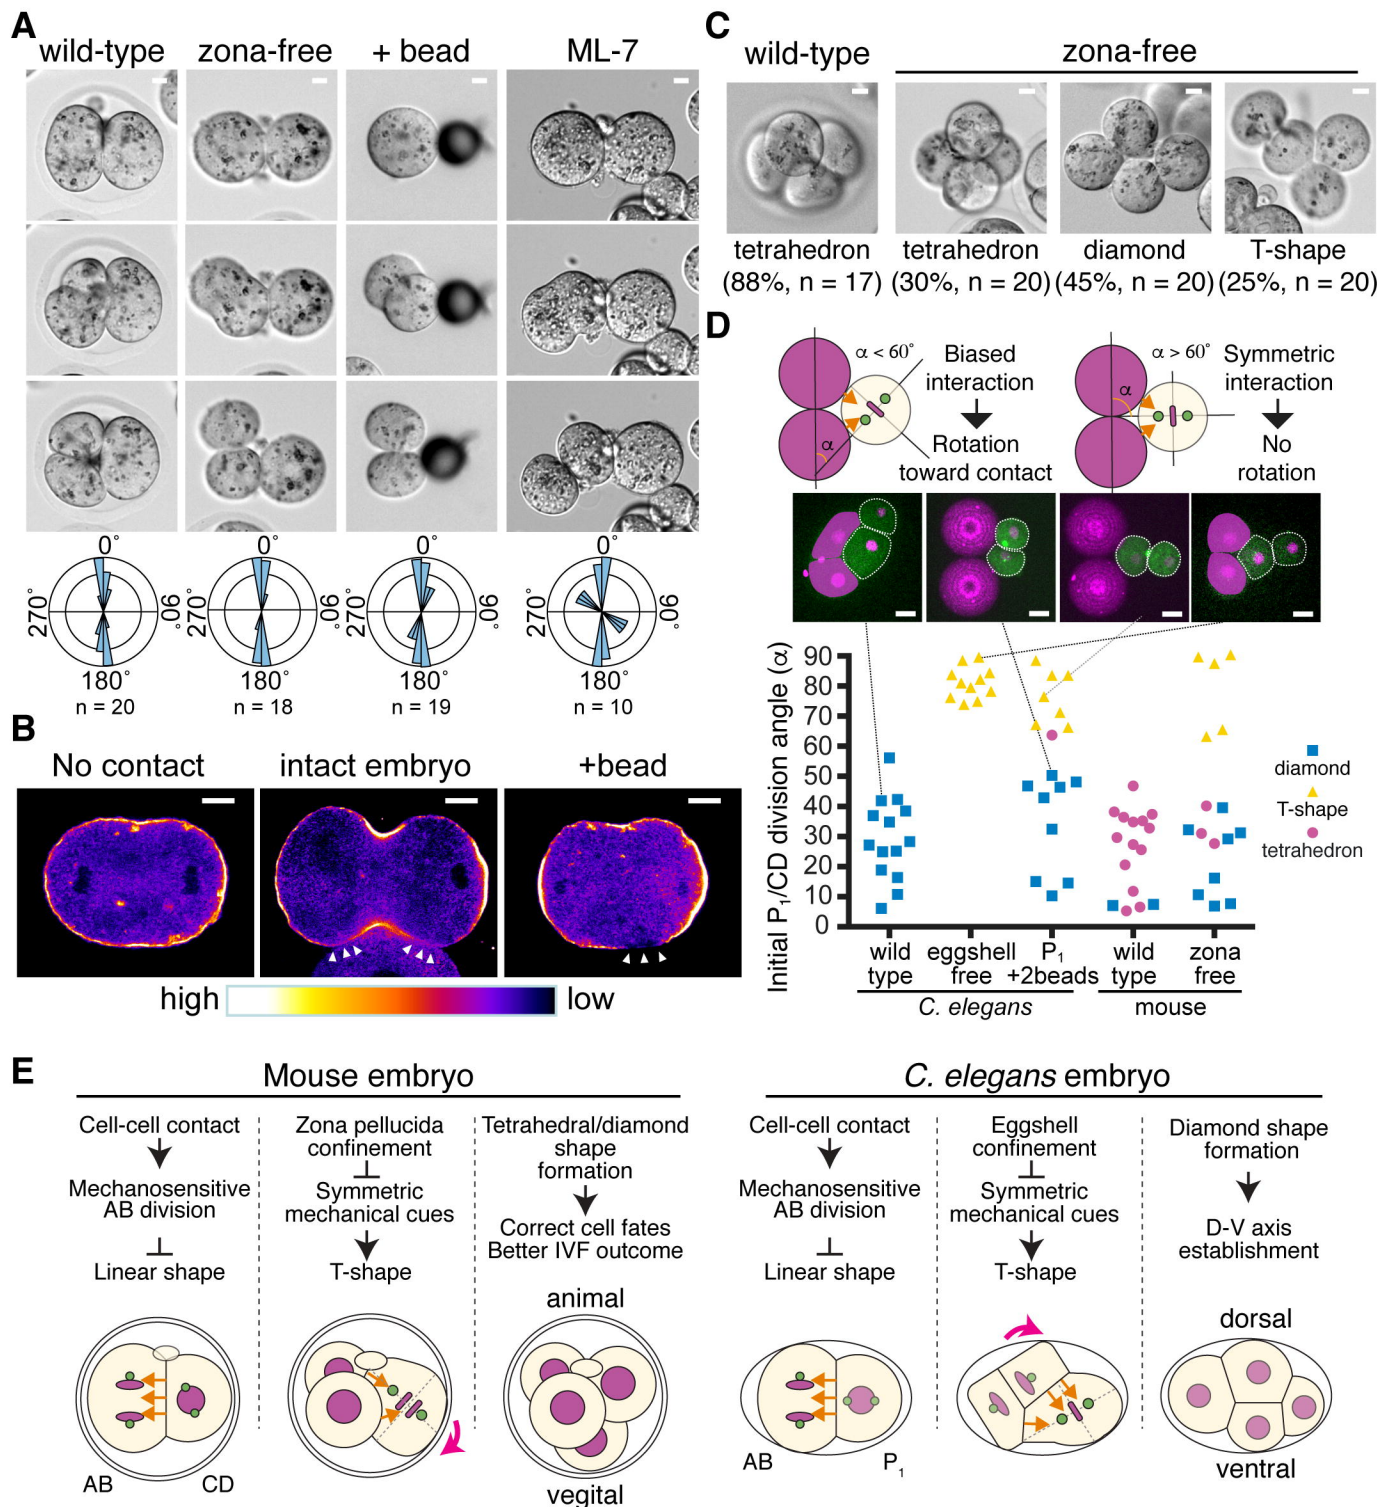

**Figure 5.** Mechanosensitive myosin pathway orients cell division in *C. elegans* and mouse embryos to establish 4-cell stage architecture.

(A) Oriented AB cell division in mouse 2-cell stage embryos. The distributions of division axes is shown at the bottom. (B) Contact-induced changes in p-RLC localization. p-RLC localizations are shown as heat map. Arrowheads indicate contact sites. (C) 4-cell architecture after CD cell division. (D) Effects of initial  $P_1$  (metaphase) and CD (onset of cell elongation) division axis orientation and extracellular material on multicellular architecture formation.  $\alpha$ , Angle of  $P_1/CD$  division axis relative to the contacting cell. (E) Common mechanism underlying mouse and *C. elegans* 4-cell architecture formation (see text). Scale bars = 10  $\mu\text{m}$ .

## Figure 6 (Sugioka, Bowerman)

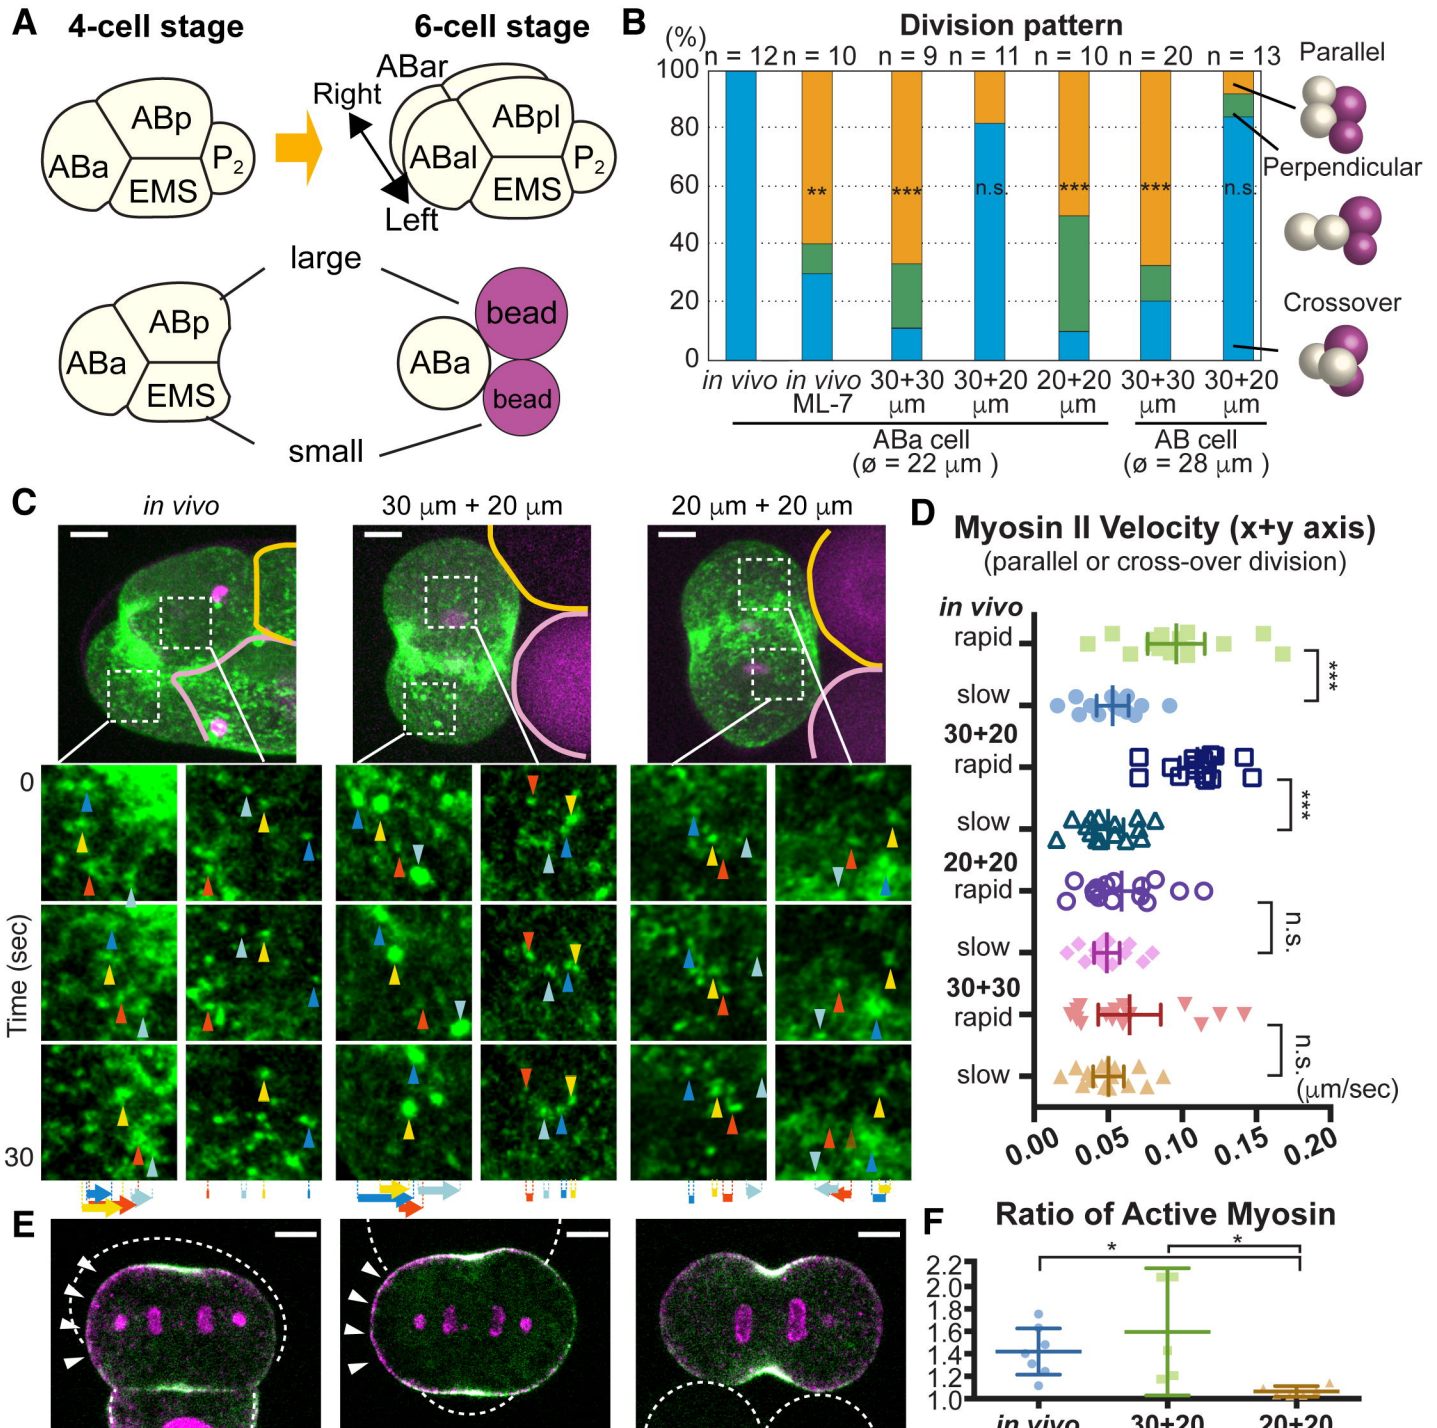

**Figure 6.** Asymmetry in cell contact size polarizes acomyosin flow to orient left-right division. (A) ABa cell division at the 4-cell stage and recapitulation of contact asymmetry using beads. (B) Effects of contact size asymmetry on ABa cell division axis. (C, D) Myosin foci movements during ABa cell division. Arrowheads and arrows in C indicate myosin foci and their total displacement, respectively. Velocities are shown in D. (E) Polarized p-RLC localization in response to asymmetric-sized contacts. Myosin (green), p-RLC (magenta), cell or bead outlines (white dotted lines), and polarized p-RLC (arrowheads) are shown. (F) Ratio of active myosin intensities between opposite halves of cells. Active myosin intensity was determined as the ratio of p-RLC to myosin intensity. Scale bars = 5  $\mu\text{m}$ . P values in B were determined with the Fisher's exact test and those in D and F were calculated by one-way ANOVA with Holm-Sidak's multiple comparisons test. \* $P < 0.05$ , \*\* $P < 0.01$ , \*\*\* $P < 0.0001$ ; n.s., not significant ( $P > 0.05$ ).

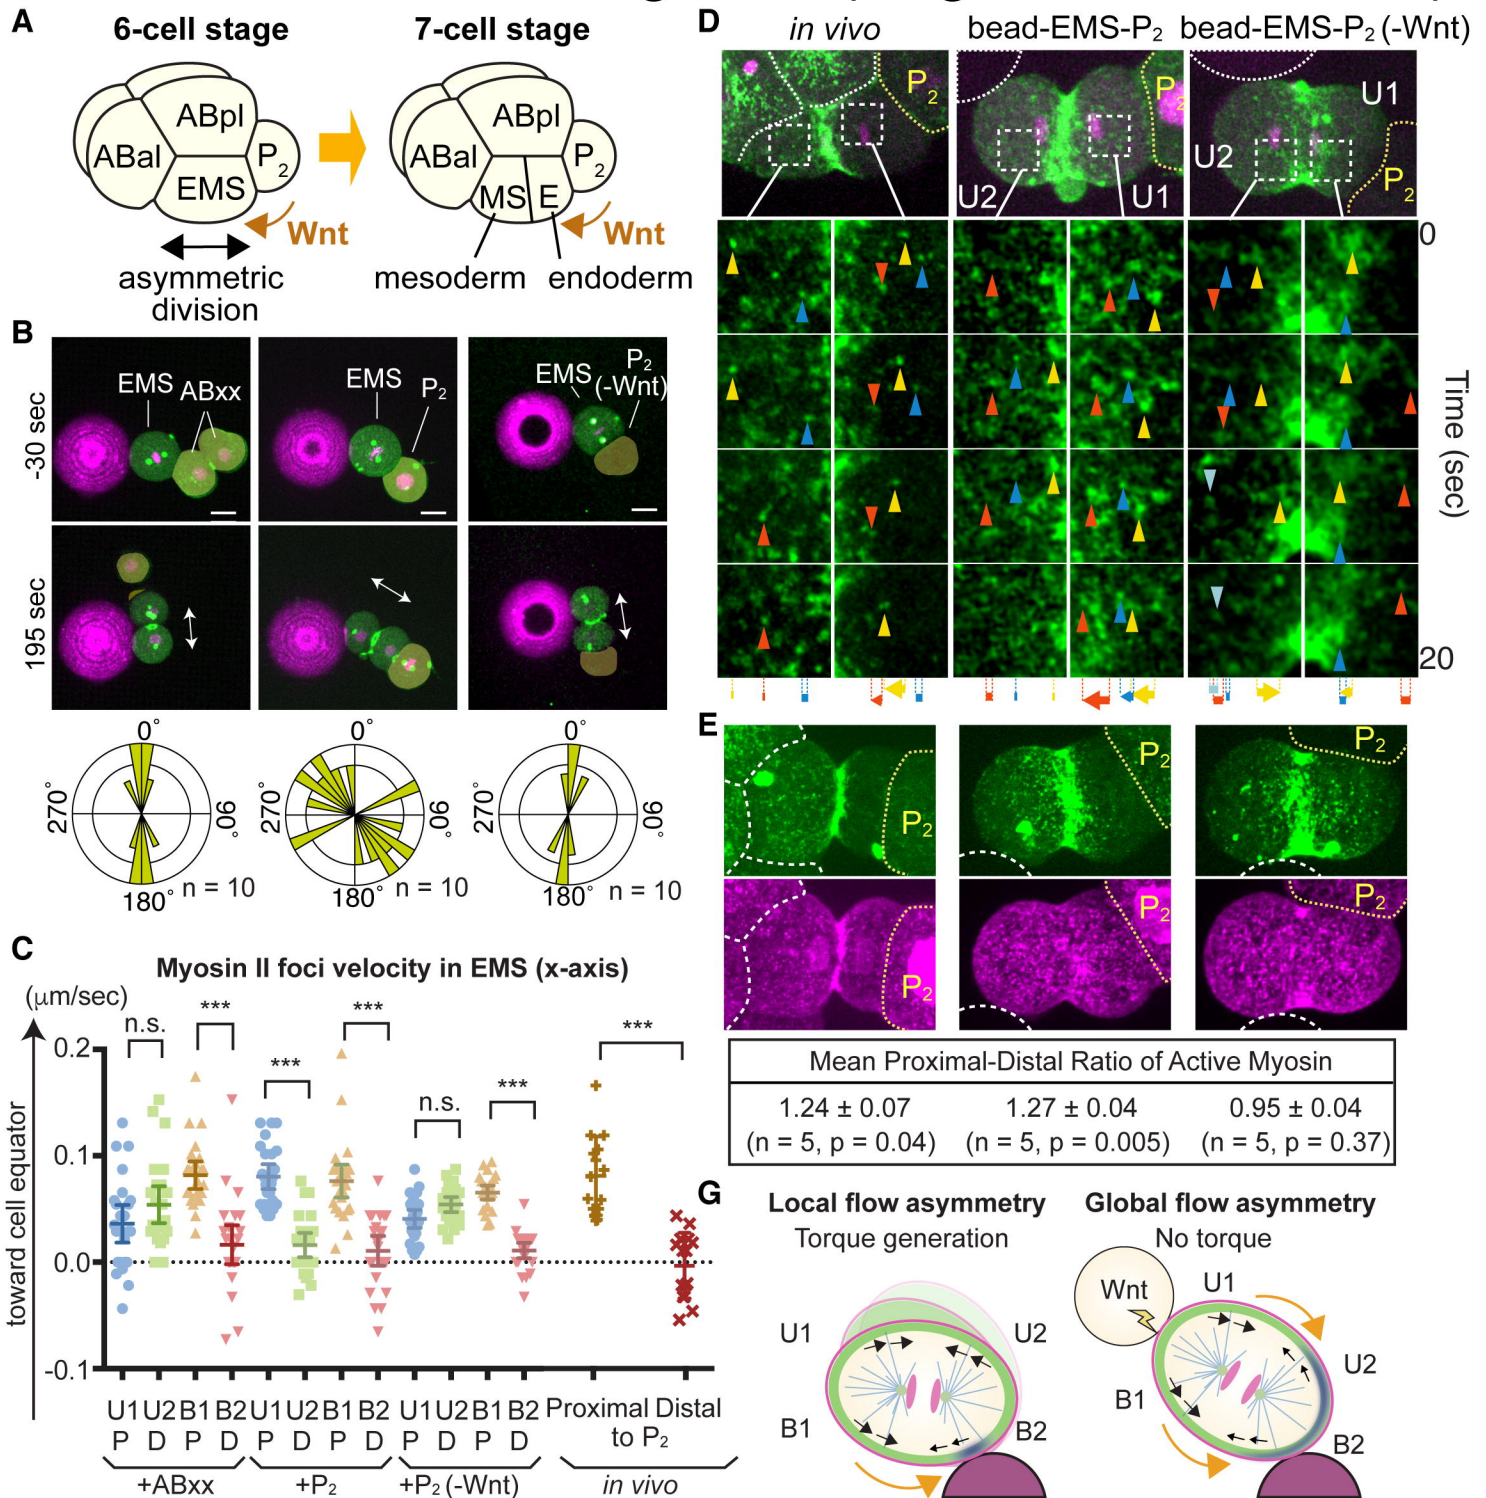

**Figure 7.** Extracellular Wnt signal polarizes actomyosin flow that abolishes mechanosensitive effects. (A) Asymmetric EMS division at the 6-cell stage is oriented towards P<sub>2</sub> cells in the presence of multiple contacts. (B) Ignorance of beads contact induced by a Wnt signal from P<sub>2</sub> cell. Myosin (green), centrosomes (green), histones (magenta), beads (magenta), and EMS division axis (arrows) are shown. P<sub>2</sub>(-Wnt) indicates the P<sub>2</sub> cell isolated from Wnt mutants. (C, D) Myosin foci velocities (C) and movements (D) during EMS division. Arrowheads and arrows indicate myosin foci and their total displacement, respectively. (E) Wnt-dependent polarization of active myosin localization. Myosin (green), p-RLC (magenta), cell or bead boundaries (white dotted lines), and P<sub>2</sub> cells (yellow dotted lines) are shown. Proximal-distal ratio of active myosin calculated similarly to Figure 6F is shown at the bottom. (G) Model of local actomyosin flow asymmetry oriented division and its abrogation by global flow asymmetry. Myosin (black arrows) and cell surface (orange arrows) movements are shown. P values were determined by one-way ANOVA with Holm-Sidak's multiple comparisons test in C and by a paired t test in E. Scale bars = 10 μm.

# Figure S1 (Sugioka, Bowerman)

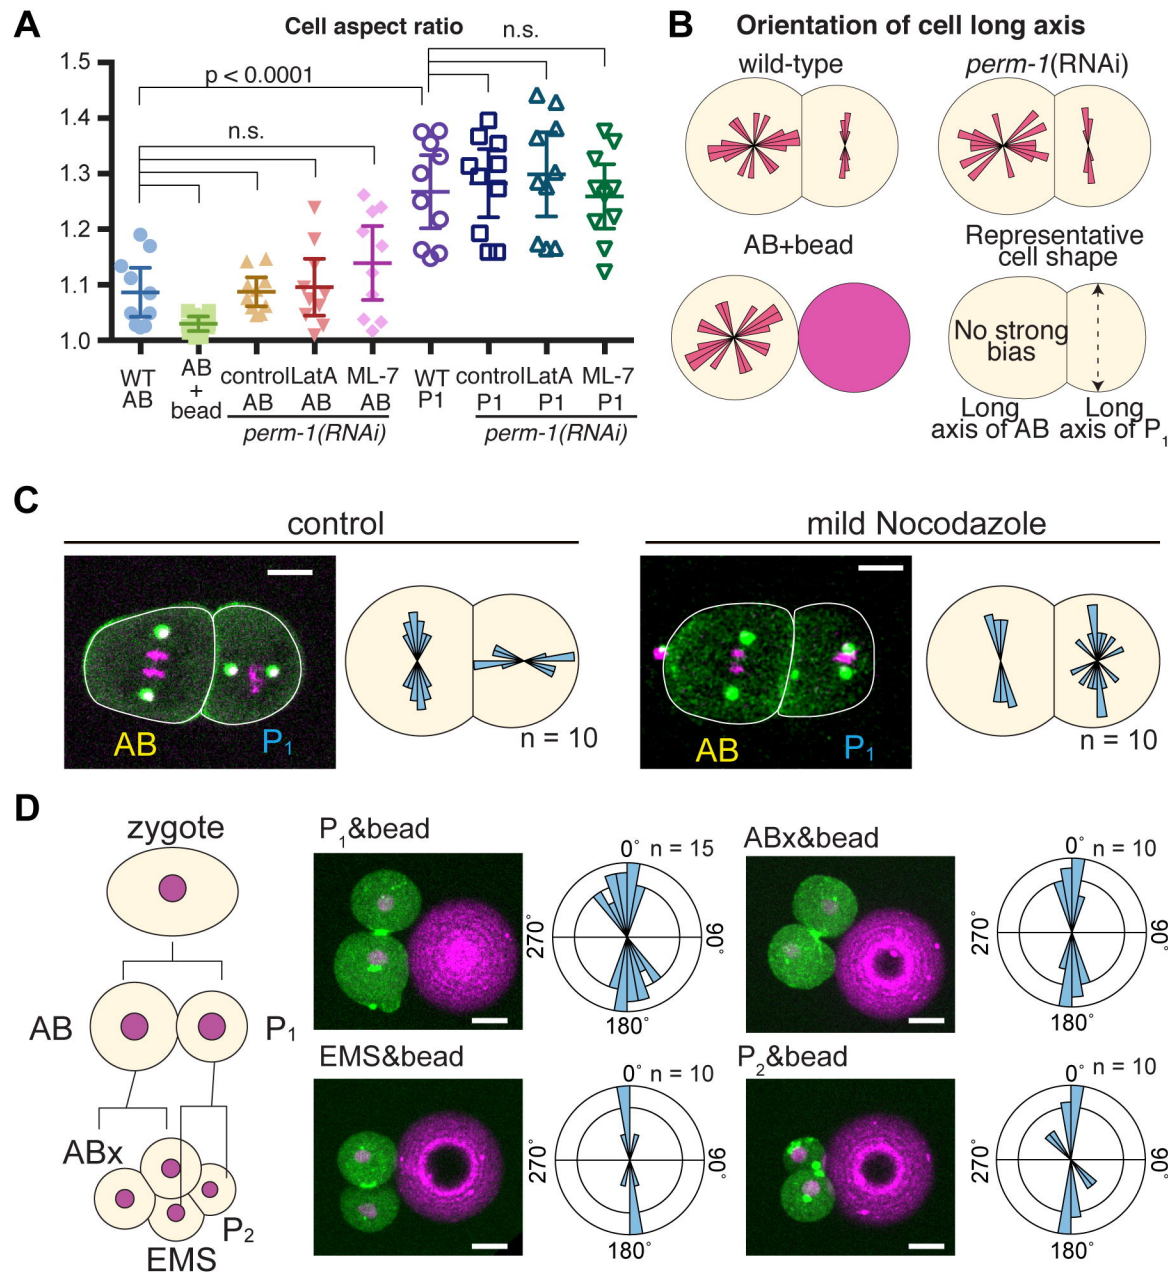

**Figure S1.** Related to Figure 1. Oriented AB division is independent of known microtubule-dynein pathways and other embryonic cells also respond to bead contact.

(A) Cell aspect ratio of indicated cells. Except for isolated AB cell with bead, cells within eggshell were quantified. P-values were calculated by one-way ANOVA with Holm-Sidak's multiple comparisons test. (B) Orientation of cell long axes. P<sub>1</sub> cell has strong bias in transverse axis while AB is not biased. (C) AB and P<sub>1</sub> division axes after treatment with 12.5 ng/ml nocodazole. Centrosomes (green/white), histones (magenta), and cell outlines (white lines) are shown. Distributions of AB division axes at anaphase and those of P<sub>1</sub> at metaphase are shown schematically. (D) Bead contact-induced oriented division in other cell types. The distribution of division axes after cytokinesis is shown as angular plots. Scale bars = 10 μm.

# Figure S2 (Sugioka, Bowerman)

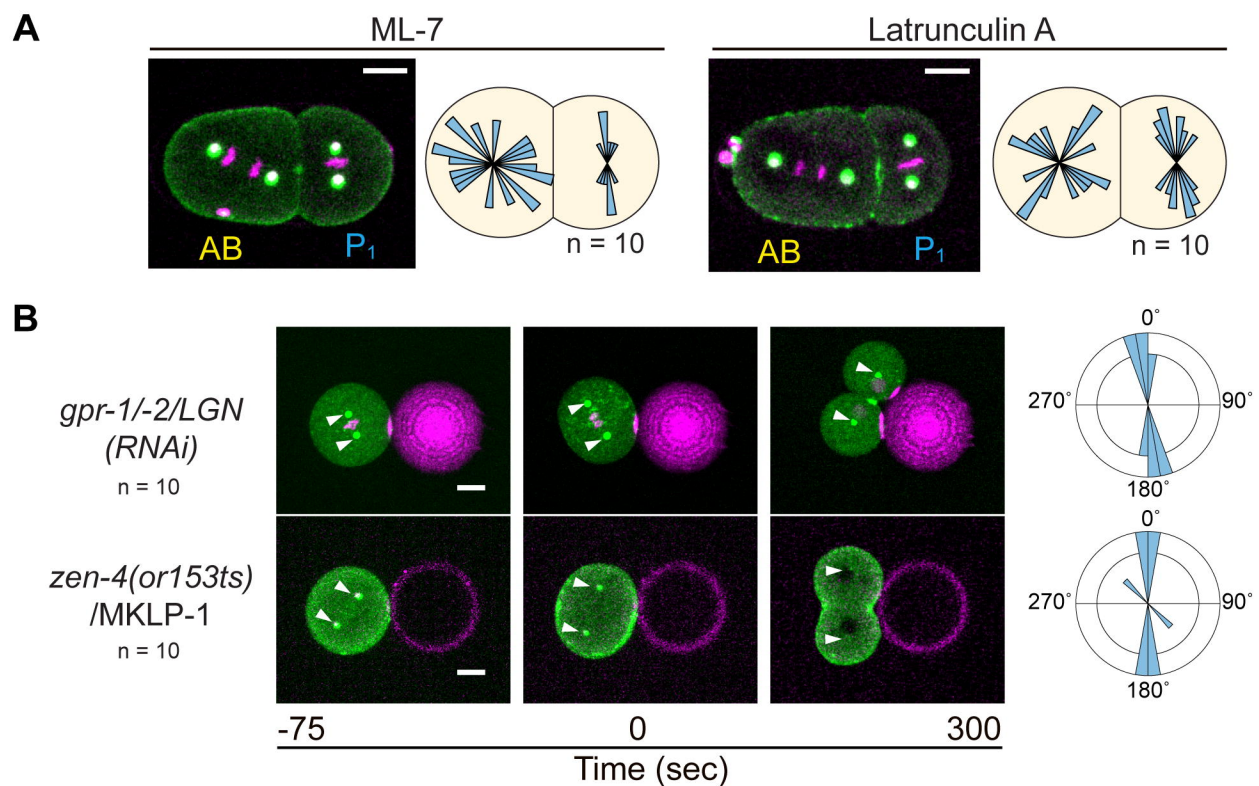

**Figure S2.** Related to Figure 2. Oriented AB division is actomyosin-dependent.

(A) Randomized AB division axes after treatment with ML-7 or latrunculin A. The distribution of AB and P<sub>1</sub> division axes is shown schematically. (B) Normal bead contact-dependent oriented AB division upon LGN knockdown or in mutants of cytokinesis. Arrowheads indicate centrosome positions. Angular plots indicate AB division axes after cell cycle exit (as evaluated by histone decondensation). Myosin (green), centrosomes (white/green), bead (magenta), and histones (magenta) are shown.



# Figure S3 (Sugioka, Bowerman)

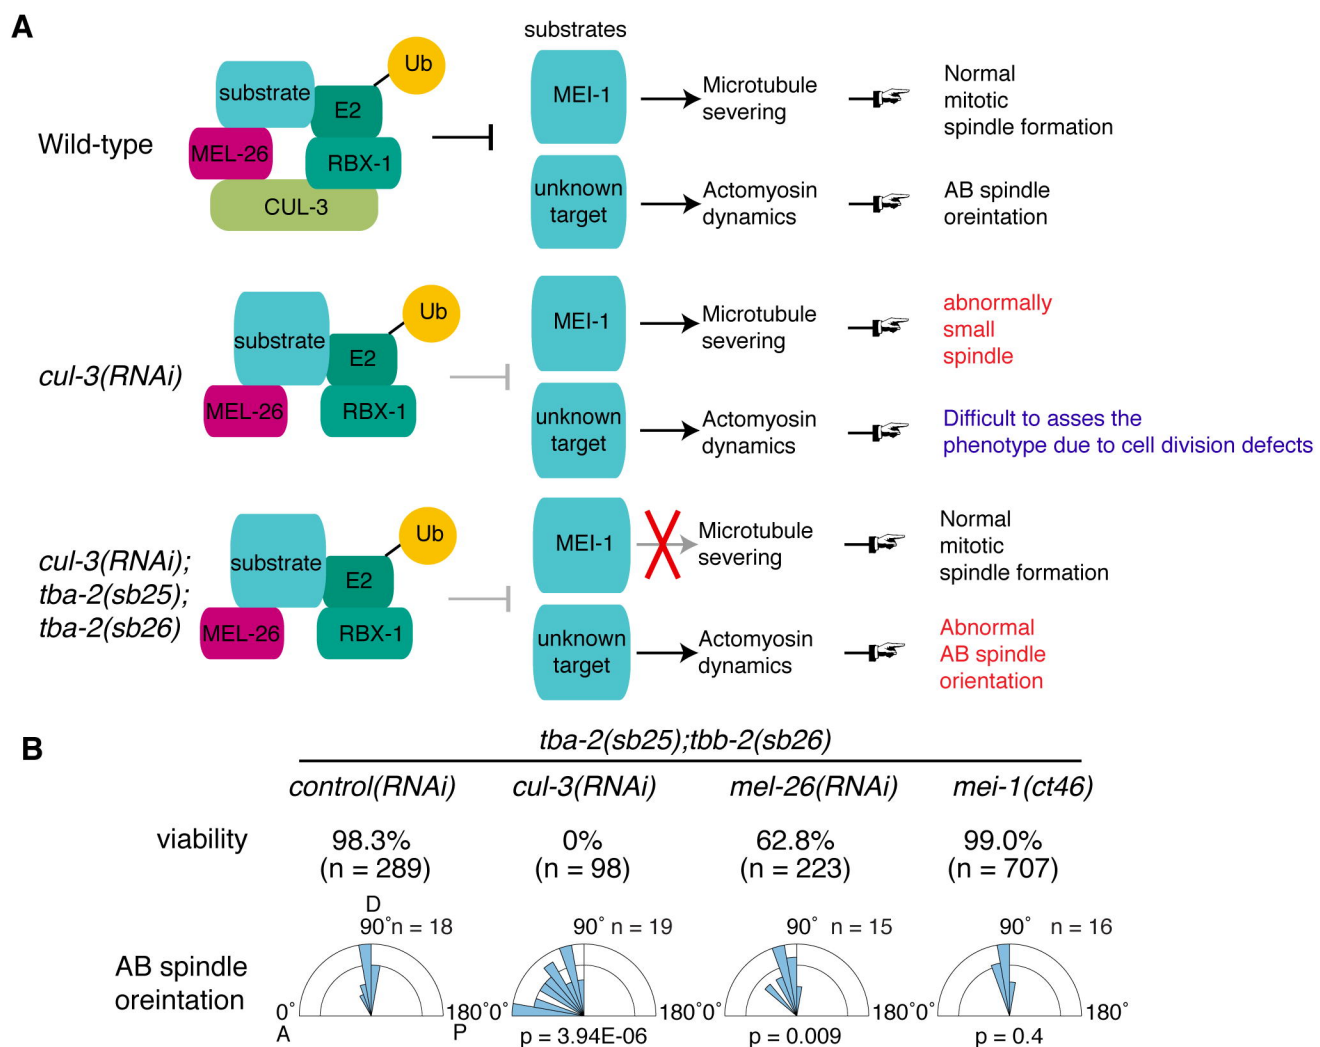

**Figure S3.** Related to Figure 2. CUL-3-MEL-26 E3 ubiquitin ligase complex regulates the AB division axis independent of MEI-1 function.

(A) Schematic illustrations of genetic backgrounds used in this study. CUL-3/Cullin forms an E3 ubiquitin ligase complex with BTB protein MEL-26, RBX-1 and E2 enzyme to ubiquitylate substrate proteins. The CUL-3-MEL-26 complex regulates the degradation of the meiosis-specific microtubule-severing protein MEI-1 during the oocyte-to-embryo transition to allow formation of a normal mitotic spindle. Upon *cul-3* or *mel-26* knock-down or in degradation-defective *mei-1(ct46)* mutants, ectopic MEI-1 protein activity during mitosis causes the formation of abnormally small spindles with short microtubules (middle panel). However, when *tba-2(sb25)* and *tbb-2(sb26)* mutations are introduced ( $\alpha$ -tubulin and  $\beta$ -tubulin alleles, respectively), microtubules become resistant to ectopic MEI-1 protein activity (Lu and Mains, 2005) and normal mitotic spindle formation is restored (bottom panel). In *cul-3(RNAi)* embryos, AB spindle orientation is defective in the *tba-2(sb25);tbb-2(sb26)* background, suggesting that this phenotype results from a failure in degradation of an unknown target. (B) Viability and AB spindle orientation after *cul-3* knockdown are independent of ectopic MEI-1 function. Eggs were laid by adult worms for around 6 h and hatched and dead embryos were counted to assess viability. Note that the degradation-defective mutant *mei-1(ct46)* showed 0% viability in a wild-type background (Lu and Mains, 2005), which was completely rescued to the wild-type level in the *tba-2(sb25);tbb-2(sb26)* background. Low viability and abnormal AB spindle orientation in *cul-3(RNAi)* and *mel-26(RNAi)* embryos suggest that CUL-3 and MEL-26 function as a complex to regulate the degradation of unknown targets other than MEI-1 protein. The weak phenotype in *mel-26(RNAi)* suggests that there are other BTB proteins involved in this process. A, P, and D in the graph indicate anterior, posterior, and dorsal sides, respectively. P values were calculated with the Watson-Williams test for equal means (n = 18, 19, 15, and 16 from left to right).

# Figure S4 (Sugioka, Bowerman)

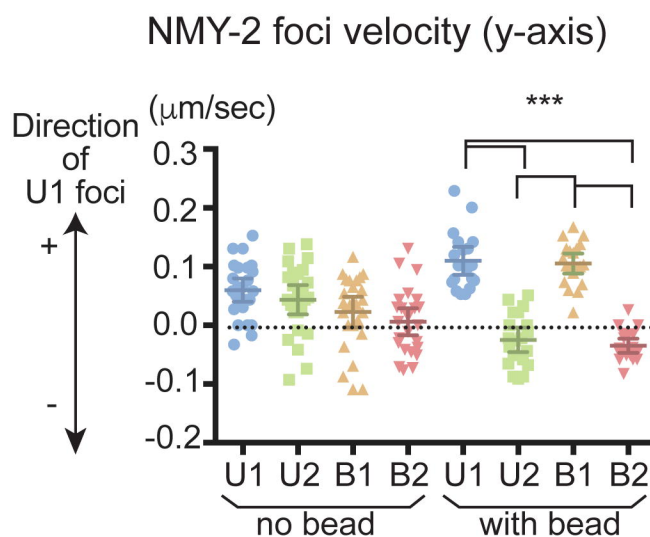

**Figure S4.** Related to Figure 3. Y axis myosin foci velocities after contact with a bead. Velocities were determined as in Figure. 3C. P values were calculated by one-way ANOVA with Holm-Sidak's multiple comparisons test.

## Figure S5 (Sugioka, Bowerman)

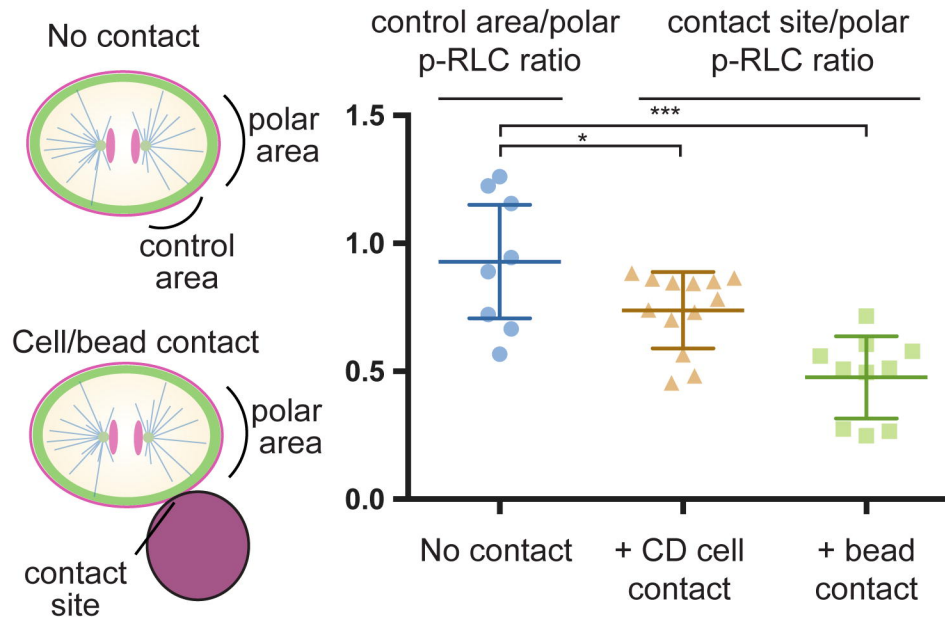

**Figure S5**, related to Figure 5. Contact-dependent reduction of RLC phosphorylation in mouse embryo. Left schematics indicate the cellular regions used for the quantification of phospho-RLC signals. In isolated cells, area between equator and pole are used as control area. Right graph shows the ratio of p-RLC signal between control and polar area in no contact and contact site and polar area in the presence of physical contact. P values were calculated by one-way ANOVA with Holm-Sidak's multiple comparisons test.

## Figure S6 (Sugioka, Bowerman)

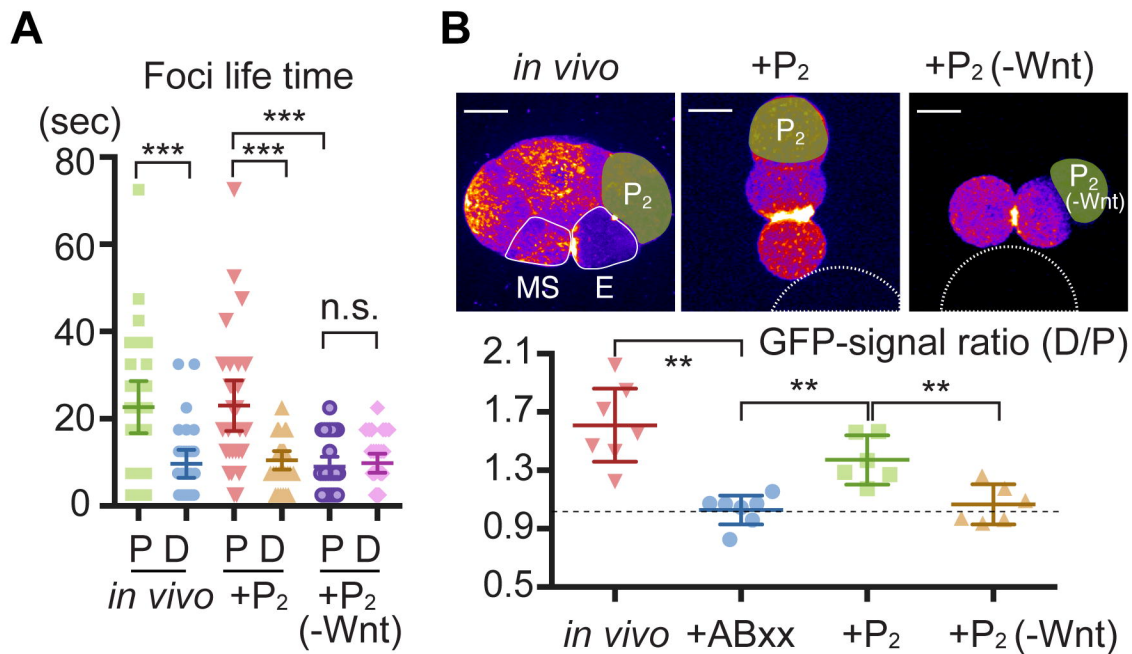

**Figure S6.** Related to Figure 7. Polarized myosin foci lifetime and intensity in the presence of Wnt signal. (A) Polarized myosin foci lifetime on the cortex of cell halves proximal and distal to the P<sub>2</sub> cell. (B) Polarized myosin localization in the presence of Wnt. Heat maps of myosin GFP signal intensity are shown. White lines in the left panel indicate EMS cells and white dotted lines in the middle and right panels indicate beads. P values were calculated by one-way ANOVA with Holm-Sidak's multiple comparisons test. \*P < 0.05, \*\*P < 0.01, \*\*\*P < 0.0001; n.s., not significant (P > 0.05). Scale bars = 10 μm.
